# Supplementary material
Source: PubMed Central journal article supplement (PMC5692545)
Supplement: pnas.1707151114.sapp.pdf [file pnas.1707151114.sapp.pdf]

## Supporting Information

Neuron-specific methylome analysis reveals epigenetic regulation and tau-related dysfunction of BRCA1 in Alzheimer's disease

Tatsuo Mano<sup>1</sup>, Kenichi Nagata<sup>2</sup>, Takashi Nonaka<sup>3</sup>, Airi Tarutani<sup>3</sup>, Tomohiro Imamura<sup>4</sup>, Tadafumi Hashimoto<sup>5</sup>, Taro Bannai<sup>1</sup>, Kagari Koshi-Mano<sup>1</sup>, Takeyuki Tsuchida<sup>1</sup>, Ryo Ohtomo<sup>1</sup>, Junko Takahashi-Fujigasaki<sup>6</sup>, Satoshi Yamashita<sup>7</sup>, Yasumasa Ohyagi<sup>8</sup>, Ryo Yamazaki<sup>4</sup>, Shoji Tsuji<sup>1</sup>, Akira Tamaoka<sup>9</sup>, Takeshi Ikeuchi<sup>10</sup>, Takaomi C. Saïdo<sup>2</sup>, Takeshi Iwatsubo<sup>5</sup>, Toshikazu Ushijima<sup>7</sup>, Shigeo Murayama<sup>6</sup>, Masato Hasegawa<sup>3</sup>, Atsushi Iwata<sup>1,11</sup>

<sup>1</sup>Department of Neurology, Graduate School of Medicine, The University of Tokyo, Japan, <sup>2</sup>Laboratory for Proteolytic Neuroscience, RIKEN Brain Science Institute, Japan, <sup>3</sup>Department of Dementia and Higher Brain Function, Tokyo Metropolitan Institute of Medical Science, Japan, <sup>4</sup>Department of Neurology, Neurological Institute, Graduate School of Medical Sciences, Kyushu University, Japan, <sup>5</sup>Department of Neuropathology, Graduate School of Medicine, The University of Tokyo, Japan, <sup>6</sup>Department of Neuropathology, Tokyo Metropolitan Geriatric Hospital, Japan, <sup>7</sup>Division of Epigenomics, National Cancer Center Research Institute, Japan, <sup>8</sup>Department of Neurology and Geriatric Medicine, Ehime University Hospital, Japan, <sup>9</sup>Department of Neurology, University of Tsukuba, Japan, <sup>10</sup>Department of Molecular Genetics, Brain Research Institute, Niigata University, Japan, <sup>11</sup>Japan Science and Technology Agency, PRESTO, Japan

## SI Material and Methods

### *Sequential detergent protein extraction*

Sequential detergent protein extraction was performed by modifying previously published methods

(1-6). Inferior temporal gyrus samples were homogenized using a Teflon homogenizer (10-strokes)

Mano *et al.*  
AD neuronal methylation reveals BRCA1 aggregation  
Supporting Information Appendix

in phosphate buffered saline (PBS), supplemented with protease inhibitor cocktail (Roche), and phosphatase inhibitor cocktail (Roche, Basel, Switzerland). The samples were then centrifuged at 20,000 ×g for 30 min at 4°C, to obtain the PBS-soluble fraction. The pellets were then subjected to sequential fractionation with 1% Triton X-100/PBS, 2% N-lauroylsarcosine (Sarkosyl)/PBS, and 0.1% sodium dodecyl sulfate (SDS)/PBS in a serial manner, each time saving the centrifuged supernatants as the soluble fractions (sup) for each detergent. The SDS insoluble pellet (ppt) was suspended in 70% formic acid (Wako Pure Chemical Industries, Osaka, Japan), and incubated at 50°C for 30 min. After evaporation, samples that had been suspended in formic acid were re-suspended in PBS and subjected to sonication to obtain formic acid-soluble fractions.

*Pyrosequencing*

Bisulfite-conversion of DNA was processed by applying 100 ng of genomic DNA to an EpiTect Bisulfite kit (Qiagen, Hilden, Germany), following the manufacturer's instructions; the final product was eluted with 50 µL buffer. We designed primers for PCR and pyrosequencing using PyroMark Assay Design Software (SI Appendix Table, S4 and S5). Samples were applied to PyroMark Q24 using PyroMark Gold Q24 Reagents (Qiagen), following the amplification of



Mano *et al.*  
AD neuronal methylome reveals BRCA1 aggregation  
Supporting Information Appendix

bisulfite-converted DNA by PCR using a PyroMark PCR Kit (Qiagen). The results were analyzed using PyroMark Q24 software (Qiagen).

*Cell culture and sample preparation*

The N2a cell line was purchased from ATCC (Manassas, VA, USA). The N2a swe.10 cell line was provided by Sam Sisodia (The University of Chicago). Cells were cultured in 5% CO<sub>2</sub> and 95% air, and incubated at 37°C. The N2a cell line was cultured in high glucose Dulbecco's modified Eagle media (DMEM) (Wako, Japan), supplemented with 10% fetal bovine serum (FBS) (Invitrogen, Carlsbad, CA, USA). The N2a swe.10 cell line was cultured in 50% high glucose DMEM and 50% Opti-MEM (Invitrogen), supplemented with 5% FBS, non-essential amino acids (NEAA), and 200 µg/mL G418 (Roche, Basel, Switzerland). Cells were tested for mycoplasma contamination by visual inspection with 4',6-diamidino-2-phenylindole (DAPI). N2a swe.10 cells were differentiated for 96hours (h) in DMEM supplemented with 1% FBS and 10 µM retinoic acid (Sigma-Aldrich, St. Louis, MO, USA). In co-culture assay, N2a cells were used for recipient cells, and were cultured at the bottom of a dish. while donor cells were cultured in the cell culture inserts. For donor cells, either N2a or N2a swe.10 cells were cultured in the same dish, but within the area of 1 µm-pored

Mano *et al.*  
AD neuronal methylation reveals BRCA1 aggregation  
Supporting Information Appendix

insert (BD Biosciences, San Jose, CA, USA). For biochemical studies, cells were harvested in PBS with 10 mM ethylenediaminetetraacetic acid (EDTA) at 4°C, and washed twice with pre-chilled PBS. Cells were re-suspended in 50 mM Tris-HCl (pH 8.0), 150 mM sodium chloride, 0.5% (w/v) sodium deoxycholate, 0.1% (w/v) sodium dodecyl sulfate (SDS), 1.0% (w/v) NP-40 substitute (Sigma-Aldrich), protease inhibitor cocktail (Roche), and phosphatase inhibitor cocktail (Roche), and sonicated. The samples were centrifuged at 20,000 ×g for 15 min at 4°C, and the supernatants collected as whole cell lysates. For immunostaining, cells were cultured on φ12 mm coverslips (MATSUNAMI, Tokyo, Japan) and fixed with 4% paraformaldehyde in 0.1 M phosphate-buffer (pH 7.4) for 10 min. For Compound E assay, N2a or N2a swe.10 cells were seeded in 6-well culture dishes at  $1 \times 10^6$ /well. Compound E (Abcam, Cambridge, UK) was added to a final concentration of 25 nM and incubated for 72 h. Cells were harvested for western blot analysis, and conditioned media were subjected to ELISA to determine the concentrations of Aβ<sub>40</sub> and Aβ<sub>42</sub>. Nuclear and cytoplasmic extracts were prepared using an NE-PER Nuclear and Cytoplasmic Extraction Kit (Pierce, Rockford, IL, USA). For recombinant Aβ assay in cultured cells, Aβ peptide (WAKO) was reconstituted in Hexafluoro-2-propanol (HFIP) (Sigma-Aldrich). After evaporation, Aβ peptide was

Mano *et al.*  
AD neuronal methylation reveals BRCA1 aggregation  
Supporting Information Appendix

reconstituted in DMSO again, and adjusted to 1mM. A $\beta$ <sub>1-40</sub> or A $\beta$ <sub>1-42</sub> was added to the medium and incubated for 36 h. Cells were harvested for western blot analysis.

*Mice brain tissues*

All animal procedures were approved by the Animal Care and Use Committee of the University of Tokyo. 3×Tg-AD mice, harboring mutant amyloid precursor protein (APP KM670/671NL) and mutant tau (MAPT P301L) transgenes, along with knocked-in human mutant Presenilin 1 (PSEN1 M146V), (7), and APP/PS1 mice expressing APP KM670/671NL and PSEN1dE9 (8) were purchased from the Mutant Mouse Regional Resource Center (MMRRC; Davis, CA, USA).

C57BL6/J mice were obtained from CLEA JAPAN, Inc. (Tokyo, Japan). All mice were bred in a pathogen-free environment, housed at no more than four animals per cage in a 12 h-light/dark-cycle, and had access to food and water *ad libitum*. Mice of either sex were subjected to the experiments. Mouse brains were carefully removed after deeply anesthetizing mice using isoflurane (Abbvie, Inc., North Chicago, IL, USA), and were separated into two hemispheres by mid-sagittal dissection. One-half was immediately stored at -80°C for other biochemical procedures (e.g., comet assay), while the other half was placed in 4% paraformaldehyde, 0.1 M phosphate-buffer (pH 7.4)

Mano *et al.*  
AD neuronal methylation reveals BRCA1 aggregation  
Supporting Information Appendix

for 48 h at 4°C, and embedded in paraffin according to standard procedures. Paraffin-embedded samples were sectioned at a thickness of 6 µm.

*Stereotactic injections*

At the age of 3 months, APP/PS1 mice were anesthetized with isoflurane and placed in a stereotactic frame SR-5M, SM-15M (Narishige, Tokyo, Japan) implemented with microinjector IMS-10 (Narishige). Lentiviral vector preparation in 1 µl volume was injected into the dentate gyrus and hippocampus bilaterally using the following coordinates: ±2.5 mm medial/lateral, -2.9 mm anterior/posterior, 2.7 mm dorsal/ventral from the bregma. The viral preparation was injected with a speed of 1 µl/min using a Hamilton syringe (75RN Neuros Syringe pst-3) (Hamilton company, Reno, NV, USA).

*Total RNA extraction and RT-qPCR analysis*

Total RNA was extracted from the inferior temporal gyrus using an RNeasy mini kit (Qiagen). To determine the RNA integrity number (RIN), we used an RNA 6000 nano assay kit (Agilent Technologies, Santa Clara, CA, USA); samples that achieved RIN > 7 were used for subsequent analysis. Total RNA concentration was measured using a Qubit RNA BR assay kit (Invitrogen).

Mano *et al.*  
AD neuronal methylome reveals BRCA1 aggregation  
Supporting Information Appendix

Total RNA (1 µg) was reverse-transcribed using ReverTra Ace (TOYOBO, Osaka, Japan) and random primers, and analyzed by TaqMan assay using hs00173233\_m1 (*BRCA1*), hs00152930\_m1 (*AURKC*), hs02743732\_s1 (*ZNF714*), and 4310884e (*GAPDH*) assays on a 7900HT Fast Real-time PCR system (Applied Biosystems, Waltham, MA, USA). Each experiment was performed in quadruplicate and average values were used for further statistical analysis. The expression of each gene was quantified relative to that of *GAPDH*.

*Western blot analysis*

Samples were incubated at 60°C with 4 × lithium dodecyl sulfate (LDS) buffer (Invitrogen) and 1% 2-mercaptoethanol for 15 min, and loaded on 4-15% Mini-PROTEAN TGX gels (Bio-Rad, Hercules, CA, USA), separated by SDS-PAGE, and transferred to polyvinylidene difluoride (PVDF) membrane by Trans-Blot Turbo Blotting System and Trans-Blot Turbo Transfer Pack (Bio-Rad, Hercules, CA, USA). Non-specific binding was blocked with EzBlock CAS (ATTO Corporation, Tokyo, Japan) for 30 min at room temperature. Membranes were then incubated with primary antibodies in Tris-buffered saline / 0.1% Tween (TBST) for 2 h at room temperature, or overnight at 4°C. Anti-BRCA1 (MS110, Abcam Cat# ab16780 Lot# RRID:AB\_2259338, 1:1000),

Mano *et al.*  
AD neuronal methylation reveals BRCA1 aggregation  
Supporting Information Appendix

anti-human/mouse BRCA1 C-terminus (440621, R and D Systems Cat# MAB22101 Lot#

RRID:AB\_1964507, Minneapolis, US; 1:500), anti-BRCA1 (Abcam Cat# ab47573 Lot#

RRID:AB\_868473; 1:1000), anti-actin (C4, Millipore Cat# MAB1501 Lot# RRID:AB\_2223041,

Billerica, MA, USA, 1:3000), anti-human Tau (HT7, Thermo Fisher Scientific Cat# MN1000 Lot#

RRID:AB\_223454; 1:1000), anti-pTau (AT8, Thermo Fisher Scientific Cat# MN1020 Lot#

RRID:AB\_223647; 1:1000), anti-pTau (AT180, Thermo Fisher Scientific Cat# MN1040 Lot#

RRID:AB\_223649; 1:1000), and anti-amyloid precursor protein (APP)(Y188, Abcam Cat# ab32136

Lot# RRID:AB\_2289606; 1:5000) were used as primary antibodies. Membranes were washed with

TBST for 10 min three times, and then incubated with secondary horseradish peroxidase-conjugated

antibodies (GE Healthcare, Little Chalfont, UK), diluted by 1:2000 in TBST for 1 h at room

temperature. After membranes were washed with TBST for 10 min three times, they were

visualized by EzWestLumi Plus (ATTO). Images were captured by LuminoGraph I (ATTO), and

were quantified by Image J software (<http://imagej.nih.gov/ij/>). The reactivity of anti-BRCA1

antibodies to murine BRCA1 was validated by transient expression of V5-tagged murine BRCA1

and knock-down with lentiviral shRNA (SI-Fig. S6A-D). Antigen pre-absorption assay with GST-

Mano *et al.*  
AD neuronal methylome reveals BRCA1 aggregation  
Supporting Information Appendix

tagged N-terminal segment of BRCA1 (residues 1-304) (GST-BR304) was conducted to validate the specificity of anti-BRCA1 antibodies used for immunostaining experiments (SI-Fig. S6E).

*Immunohistochemistry*

Human and mouse paraffin sections were de-paraffinized, rehydrated, and subjected to antigen retrieval procedure in sodium citrate buffer containing 10 mM sodium citrate pH 6.0 and 0.05% Tween 20 for 20 min at 110°C. Immunostaining procedure was performed with VECTASTAIN Elite ABC Kit (Vector Laboratories, Burlingame, CA, USA). Samples were incubated with 10% normal goat serum (NGS)/PBS for 30 min at room temperature to block non-specific binding. Sections were then incubated with primary antibodies diluted by TBST for 2 h at room temperature, or overnight at 4°C. Anti-BRCA1 (MS110, Abcam Cat# ab16780 Lot# RRID:AB\_2259338; 1:1000), anti-BRCA1 (Sigma-Aldrich Cat# HPA034966 Lot# RRID:AB\_10795287, 1:1000), anti-AURKC (Sigma-Aldrich Cat# HPA034859 Lot# RRID:AB\_10670298; 1:1000), anti-  $\gamma$ -H2ax(Ser139) (JBW301, Millipore Cat# 05-636 Lot# RRID:AB\_309864; 1:1000), anti-  $\gamma$ -H2ax(Ser139) (EP854(2)Y, Abcam Cat# 2212-1 Lot# RRID:AB\_1267194; 1:1000), anti-pTau (AT180, Thermo Fisher Scientific Cat# MN1040 Lot# RRID:AB\_223649; 1:1000), anti-pTau (AT8, Thermo Fisher

Mano *et al.*  
AD neuronal methylome reveals BRCA1 aggregation  
Supporting Information Appendix

Scientific Cat# MN1020 Lot# RRID:AB\_223647; 1:1000), anti-human total tau (HT7, Thermo  
Fisher Scientific Cat# MN1000 Lot# RRID:AB\_223454; 1:1000), anti-amyloid  $\beta$ (1-16) (6E10,  
BioLegend; 1:1000), anti-phospho-ATR (Ser428) (Cell Signaling Technology Cat# 2853S Lot#  
RRID:AB\_2290281, MA, USA; 1:500), anti-phospho-ATM (Ser1981) (D6H9, Cell Signaling  
Technology Cat# 5883 Lot# RRID:AB\_10013749; 1:500), anti-phospho-Chk1 (Ser345) (133D3,  
Cell Signaling Technology Cat# 2348S Lot# RRID:AB\_331212; 1:500), anti-phospho-Chk2  
(Thr68) (C13C1, Cell Signaling Technology Cat# 2197S Lot# RRID:AB\_2080501; 1:500), anti-  
phospho-p53 (Ser15) (16G8, Cell Signaling Technology Cat# 9286L Lot# RRID:AB\_331742;  
1:500), anti-RAD51 (Santa Cruz Biotechnology Cat# sc-8349 Lot# RRID:AB\_2253533, CA, USA;  
1:100), anti-BRCA2 (Abcam Cat# ab123491 Lot# RRID:AB\_10972163; 1:1000), anti-Mre11  
(Abcam Cat# ab214 Lot# RRID:AB\_302859; 1:1000), anti-ATR (Abcam Cat# ab2905 Lot#  
RRID:AB\_303400; 1:1000), and anti-p95 NBS1 (Abcam Cat# ab32074 Lot# RRID:AB\_777007;  
1:1000) were used as primary antibodies. Sections were washed with TBST for 10 min three times  
and incubated with biotinylated secondary antibody (Vector Laboratories). Sections were repeatedly  
washed with TBST for 10 min three times, and specific antibody binding was visualized with



Mano *et al.*  
AD neuronal methylome reveals BRCA1 aggregation  
Supporting Information Appendix

avidin-biotin enzyme complex (Vector Laboratories) and 3,3'-Diaminobenzidine (Sigma-Aldrich).

For immunofluorescence study, sections were de-paraffinized, rehydrated, and were subjected to antigen retrieval in sodium citrate buffer containing 10 mM sodium citrate pH 6.0 and 0.05% Tween 20 for 20 min at 110°C. Sections were then incubated with Sudan black solution (0.1% Sudan Black B in 70% ethanol) to reduce auto-fluorescence and nonspecific antibody binding, followed by blocking with 10% NGS / PBS for 30 min at room temperature. After sections were incubated with primary antibodies for anti-NeuN (A60, Millipore Cat# MAB377 Lot# RRID: AB\_10048713; 1:1000) or anti- $\gamma$ -H2ax (Ser139) (JBW301, Millipore Cat# 05-636 Lot# RRID: AB\_309864; 1:1000), anti-BRCA1 (D54A8, Cell Signaling Technology Cat# 9025S Lot# RRID:AB\_11217634; 1:1000), anti-53BP1 (Novus Cat# NB100-904 Lot# RRID:AB\_10002714; 1:1000) and anti-tubulin  $\beta$ -3 (Abcam Cat# ab18207 Lot# RRID:AB\_444319) diluted by TBST for 2 h at room temperature, they were washed with TBST and the immunoreactivity was visualized with Alexa 594-conjugated secondary antibody (Life Technologies, Carlsbad, CA, USA). As for co-immunostaining of BRCA1 (MS110) and pTau (AT8), primary antibodies were labeled with Alexa 488 or Alexa 594 using Zenon labeling kit (Thermo Fisher Scientific, Waltham, MA, USA) according to the manufacturer's

Mano *et al.*  
AD neuronal methylome reveals BRCA1 aggregation  
Supporting Information Appendix

instructions. Nucleus was visualized by DAPI. Images were captured by Axioplan 2 fluorescent microscope (Carl Zeiss, Oberkochen, Germany) with Axiocam HRc Charge-Coupled Device (CCD) camera system (Carl Zeiss) or BZ-X700 (Keyence, Tokyo, Japan) or confocal microscope LSM510 (Carl Zeiss).

*Complimentary DNAs and expression constructs*

Complimentary DNA of murine *Brca1* mRNA was obtained from pCMV-SPORT6-mBrca1 (clone ID 30431022), purchased from DNAFORM (Yokohama, Japan) and used to generate entry clone vectors by BP recombination with pDONR221, after addition of attB1 and attB2 sequences. For internal ribosomal entry site (IRES) constructs, AcGFP1 cDNA of pIRES2-AcGFP1 (Clontech, Mountain View, CA, USA) was replaced with mCherry to generate pIRES2-mCherry.

Complimentary DNA of APP mutant (KM670/671NL) was sub-cloned into the multiple cloning sites of pIRES2-mCherry to generate entry clone vectors. Two murine BRCA1 shRNA target sequences, 5'-AGCGGGCGACCATGAAGTATA-3', 5'-AATTCAGAGCCAGATTATGTA-3', and three human BRCA1 shRNA target sequence, 5'-CAGCAGTTTATTACTCACTAA-3', 5'-CAGGAAATGGCTGAACTAGAA-3', and 5'-CCCACCTAATTGTACTGAATT-3' were sub-cloned

Mano *et al.*  
AD neuronal methylation reveals BRCA1 aggregation  
Supporting Information Appendix

into pcDNA6.2-GW/EmGFP-miR (Life Technologies). pcDNA6.2-GW/EmGFP-miR-nega control (Life Technologies) was used as negative control shRNA construct. These plasmids were subjected to BP recombination with pDONR221 to generate entry clone vectors. The resulting plasmids were subjected to LR recombination with pLenti6.4/R4R2/V5-DEST MultiSite and pENTR-5feCMVp to generate recombinant lentivirus vectors.

*Lentivirus production and concentration*

293FT cells were transfected with the recombinant lentivirus vector and packaging plasmids mix (Life Technologies) using polyethylenimine (PEI) (Polysciences, Warrington, PA, USA) following a previously published protocol (9). Produced lentivirus was harvested 72 h post-transfection, centrifuged to eliminate cell debris, and filtered through a 0.22  $\mu$ m PVDF filter (Millipore).

Lentivirus was centrifuged at 20,000  $\times g$  for 24 h and re-suspended with Hank's Balanced Salt Solution (HBSS) for purification and concentration. Infectious titers were determined by Lenti-X qRT-PCR Titration Kit (Clontech), according to the manufacturer's instructions, to obtain  $1 \times 10^{8-9}$  IFU/mL.

Mano *et al.*  
AD neuronal methylation reveals BRCA1 aggregation  
Supporting Information Appendix

*Primary neuronal culture*

Mouse primary neuronal culture was prepared as previously described with some modifications

(10). Briefly, cortex from P0 mouse brains were dissociated using Nerve-Cell Culture System

(SUMITOMO, Tokyo, Japan) and seeded at  $1 \times 10^4$ /mL on poly-D-lysine pre-coated coverslips

(Neuvitro, Vancouver, WA, USA) in Neurobasal medium (Invitrogen) containing 2% B27

supplement (Invitrogen). Cells were transduced with lentivirus at day *in vitro* (DIV) 1, fixed with

4% PFA at DIV 5, and subjected to immunofluorescence staining. Half of the media was replaced

with fresh media every 2 days. Cytarabine (5  $\mu$ M) was added at DIV 1 to inhibit glial proliferation.

The length of neurites was measured using ImageJ software ([www.rsweb.nih.gov/ij/](http://www.rsweb.nih.gov/ij/)).

*Enzyme-Linked Immuno-Sorbent Assay (ELISA)*

The concentration of A $\beta$ <sub>40</sub> and A $\beta$ <sub>42</sub> in culture medium was measured using a Human/Rat amyloid-

$\beta$  ELISA Kit (Wako) following the manufacturer's instructions. The conditioned media from N2a

or N2a swe.10 cells was collected and subjected to ELISA.

Mano *et al.*  
AD neuronal methylome reveals BRCA1 aggregation  
Supporting Information Appendix

*Seed-dependent aggregation of tau in cultured cells*

Tau 4R1N wild-type or P301L mutant was transiently overexpressed in SH-SY5Y cells by transfection of 1 µg wild-type human tau 4R1N or mutant P301L cDNA in pSG5 (pSG5-tau 4R1N or pSG5-P301L) with 3 µl of X-treameGENE 9 (Sigma-Aldrich) in 100 µL of Opti-MEM. After overnight incubation, 4 µg of recombinant tau 4R1N (full-length: FL) or C-terminal fragment (residues 251-441) fibrils (11) was introduced with MultiFectam (Promega, Fitchburg, WI, USA) as described (12). After incubation for 5 h, the medium was replaced with fresh DMEM/F12 and culture was continued for 2 days. The cells were prepared for immunofluorescence and/or immunoblotting analyses as described below.

*Fractionation of cellular proteins and immunoblotting*

SH-SY5Y cells grown in a six-well plate were transfected with several expression vectors and introduced with tau fibrils as described above. After incubation for 2 days, cells were prepared for immunoblotting as described (13). Cells were lysed in 300 µL of homogenization buffer (HB buffer: 10 mM Tris-HCl, pH 7.5 containing 0.8 M NaCl, 1 mM ethyleneglycol bis (2-aminoethyl ether)-*N,N,N,N*-tetraacetic acid (EGTA), 1 mM dithiothreitol (DTT) and 1% N-lauroylsarcosine

Mano *et al.*  
AD neuronal methylation reveals BRCA1 aggregation  
Supporting Information Appendix

sodium salt (Sarkosyl)) by brief sonication. The lysates were centrifuged at 100,000 ×g for 20 min at room temperature. The supernatant was recovered as Sarkosyl (Sar)-soluble fraction (sup). The pellet was suspended in 100 μL SDS-sample buffer and sonicated. The resulting samples were used as the Sar-insoluble fraction (ppt). Each sample was separated by SDS-PAGE and immunoblotted with the indicated antibodies.

*Immunoelectron microscopy*

Sarkosyl-insoluble fractions were prepared from AD patients' brains as described (14). The samples were dropped onto carbon-coated nickel grids (Nissin EM, Tokyo, Japan). The grids were immunostained with primary antibodies (anti-BRCA1 antibody, MS110, 1:100) and secondary antibody conjugated to 10 nm gold particles (BBI Solutions, Cardiff, UK, 1:50) as described (15). Electron micrograph images were recorded with a JEOL JEM-1400 electron microscope (JEOL, Tokyo, Japan).

*Immunoprecipitation*

Anti-tau antibody (HT7, 1:100) was covalently conjugated with protein G magnetic beads (MBL, Nagoya, Japan) using dimethylpiperimidate (DMP). Brain tissue was homogenized in

Mano *et al.*  
AD neuronal methylome reveals BRCA1 aggregation  
Supporting Information Appendix

immunoprecipitation (IP) buffer (50 mM Tris-HCl pH 7.5, 150 mM NaCl, 1% NP-40, 0.5% sodium deoxycholate, 1 mM EDTA, protease inhibitor cocktail (Roche), and phosphatase inhibitor cocktail (Roche)) and centrifuged at 20,000 ×g for 15 min at 4°C. The supernatant was mixed with antibody-coupled magnetic beads at 4°C for 1 h, and washed with IP buffer three times. The samples were eluted with 0.1 M Glycine-HCl pH 2.5 and 2M Urea, and subjected to western blot analysis.

*Genetic study*

*TREM2* gene was amplified using primers shown in SI Appendix Table S1. Direct sequence analysis was performed by using the ABI 3700 instrument (Applied Biosystems, Carlsbad, CA, USA) with sequencing primers.

*Statistical analyses*

We used GraphPad Prism 6 software (GraphPad, San Diego, CA, USA) for statistical analyses.

Unless otherwise noted, the significance of differences between groups were determined using *t*-tests. P-values are shown as \*\*\*\*\* P < 0.00001, \*\*\*\* P < 0.0001, \*\*\* P < 0.001, \*\* P < 0.01, \* P < 0.05 respectively unless otherwise noted.

### SI References

1. Selkoe DJ, Ihara Y, & Salazar FJ (1982) Alzheimer's disease: insolubility of partially purified paired helical filaments in sodium dodecyl sulfate and urea. *Science* 215(4537):1243-1245.
2. Ihara Y, Abraham C, & Selkoe DJ (1983) Antibodies to paired helical filaments in Alzheimer's disease do not recognize normal brain proteins. *Nature* 304(5928):727-730.
3. Selkoe DJ, Abraham CR, Podlisny MB, & Duffy LK (1986) Isolation of low-molecular-weight proteins from amyloid plaque fibers in Alzheimer's disease. *Journal of neurochemistry* 46(6):1820-1834.
4. Kondo J, *et al.* (1988) The carboxyl third of tau is tightly bound to paired helical filaments. *Neuron* 1(9):827-834.
5. Ksiezak-Reding H, Morgan K, & Dickson DW (1994) Tau immunoreactivity and SDS solubility of two populations of paired helical filaments that differ in morphology. *Brain research* 649(1-2):185-196.
6. Ksiezak-Reding H & Wall JS (1994) Mass and physical dimensions of two distinct populations of paired helical filaments. *Neurobiology of aging* 15(1):11-19.
7. Oddo S, *et al.* (2003) Triple-Transgenic Model of Alzheimer's Disease with Plaques and Tangles. *Neuron* 39(3):409-421.
8. Jankowsky JL, *et al.* (2001) Co-expression of multiple transgenes in mouse CNS: a comparison of strategies. *Biomol Eng* 17(6):157-165.
9. Reed SE, Staley EM, Mayginnes JP, Pintel DJ, & Tullis GE (2006) Transfection of mammalian cells using linear polyethylenimine is a simple and effective means of producing recombinant adeno-associated virus vectors. *Journal of virological methods* 138(1-2):85-98.
10. Beaudoin GM, 3rd, *et al.* (2012) Culturing pyramidal neurons from the early postnatal mouse hippocampus and cortex. *Nature protocols* 7(9):1741-1754.



Mano *et al.*

AD neuronal methylation reveals BRCA1 aggregation

Supporting Information Appendix

11. Nonaka T, Watanabe ST, Iwatsubo T, & Hasegawa M (2010) Seeded aggregation and toxicity of {alpha}-synuclein and tau: cellular models of neurodegenerative diseases. *The Journal of biological chemistry* 285(45):34885-34898.
12. Nonaka T, *et al.* (2013) Prion-like properties of pathological TDP-43 aggregates from diseased brains. *Cell reports* 4(1):124-134.
13. Nonaka T, *et al.* (2016) Phosphorylation of TAR DNA-binding Protein of 43 kDa (TDP-43) by Truncated Casein Kinase 1delta Triggers Mislocalization and Accumulation of TDP-43. *The Journal of biological chemistry* 291(11):5473-5483.
14. Taniguchi-Watanabe S, *et al.* (2016) Biochemical classification of tauopathies by immunoblot, protein sequence and mass spectrometric analyses of sarkosyl-insoluble and trypsin-resistant tau. *Acta neuropathologica* 131(2):267-280.
15. Hasegawa M, *et al.* (2008) Phosphorylated TDP-43 in frontotemporal lobar degeneration and amyotrophic lateral sclerosis. *Annals of neurology* 64(1):60-70.

Mano *et al.*  
 AD neuronal methylome reveals BRCA1 aggregation  
 Supporting Information Appendix

**Table S1**

Analysis of *TREM2* gene in NC and AD samples.

| Single variant analysis |             | Position | Allele |   | NC (frequency) |         |         | AD (frequency) |         |         |
|-------------------------|-------------|----------|--------|---|----------------|---------|---------|----------------|---------|---------|
| Variant                 | dbSNP       |          | M      | m | MM             | Mm      | mm      | MM             | Mm      | mm      |
| L211P                   | rs2234256   | 41126655 | A      | g | 30 (1.0)       | 0 (0.0) | 0 (0.0) | 30 (1.0)       | 0 (0.0) | 0 (0.0) |
| H157Y                   | rs2234255   | 41127543 | G      | a | 30 (1.0)       | 0 (0.0) | 0 (0.0) | 30 (1.0)       | 0 (0.0) | 0 (0.0) |
| R136Q                   | rs149622783 | 41127605 | C      | t | 30 (1.0)       | 0 (0.0) | 0 (0.0) | 30 (1.0)       | 0 (0.0) | 0 (0.0) |
| R98W                    | rs147564421 | 41129100 | G      | a | 30 (1.0)       | 0 (0.0) | 0 (0.0) | 30 (1.0)       | 0 (0.0) | 0 (0.0) |
| T96K                    | rs2234253   | 41129105 | G      | t | 30 (1.0)       | 0 (0.0) | 0 (0.0) | 30 (1.0)       | 0 (0.0) | 0 (0.0) |
| D87N                    | rs142232675 | 41129133 | C      | t | 30 (1.0)       | 0 (0.0) | 0 (0.0) | 30 (1.0)       | 0 (0.0) | 0 (0.0) |
| N68K                    | NA          | 41129188 | G      | c | 30 (1.0)       | 0 (0.0) | 0 (0.0) | 30 (1.0)       | 0 (0.0) | 0 (0.0) |
| T66M                    | rs201258663 | 41129195 | G      | a | 30 (1.0)       | 0 (0.0) | 0 (0.0) | 30 (1.0)       | 0 (0.0) | 0 (0.0) |
| R62H                    | rs143332484 | 41129207 | C      | t | 30 (1.0)       | 0 (0.0) | 0 (0.0) | 30 (1.0)       | 0 (0.0) | 0 (0.0) |
| R47H                    | rs75932628  | 41129252 | C      | t | 30 (1.0)       | 0 (0.0) | 0 (0.0) | 30 (1.0)       | 0 (0.0) | 0 (0.0) |
| Y38C                    | NA          | 41129279 | A      | g | 30 (1.0)       | 0 (0.0) | 0 (0.0) | 30 (1.0)       | 0 (0.0) | 0 (0.0) |
| Q33X                    | rs104894002 | 41129295 | G      | a | 30 (1.0)       | 0 (0.0) | 0 (0.0) | 30 (1.0)       | 0 (0.0) | 0 (0.0) |

M, major allele; m, minor allele; MM, major genotype; Mm, heterozygous genotype; mm, minor

genotype. Position refers to the location of the variant in base pairs in chromosome 6 (hg19).

Mano *et al.*  
AD neuronal methylome reveals BRCA1 aggregation  
Supporting Information Appendix

**Table S2**

Clinical demographics of postmortem DLB brains used in methylation analysis. P values are

calculated by *t*-test or chi-square test.

|                      | NC         | DLB        | statistics |
|----------------------|------------|------------|------------|
| # of samples         | 30         | 21         |            |
| male ratio (%)       | 50         | 61.9       | P = 0.558  |
| age at death         | 76.7 ± 7.4 | 81.2 ± 8.5 | P = 0.0504 |
| <i>APOE</i> ε4 ratio | 26.7       | 28.6       | P = 1.00   |

Mano *et al.*  
AD neuronal methylome reveals BRCA1 aggregation  
Supporting Information Appendix

**Table S3**

Clinical demographics of postmortem NC and AD brains used in expression analysis. P values are

calculated by *t*-test or chi-square test.

|                | NC         | AD         | statistics |
|----------------|------------|------------|------------|
| # of samples   | 9          | 9          |            |
| male ratio (%) | 67         | 33         | P = 0.35   |
| age at death   | 75.8 ± 3.9 | 79.8 ± 6.8 | P = 0.14   |

Mano *et al.*  
AD neuronal methylome reveals BRCA1 aggregation  
Supporting Information Appendix

**Table S4**

Pyrosequencing primers used for validation experiment. Forward and Reverse are initial PCR

primers and Sequence corresponds to sequencing primers. [Biotin] corresponds to biotinylated

primer.

| Probe ID                 | Purpose  | Sequence |                                         |     |
|--------------------------|----------|----------|-----------------------------------------|-----|
| cg25802888               | Forward  | 5'-      | [Biotin]-TTTTGGTTGTGAGTAGGTATAGT        | -3' |
|                          | Reverse  | 5'-      | AAAACCTCAATCCAAAATTCC                   | -3' |
|                          | Sequence | 5'-      | AATATACATACCTCAACTAAAAAA                | -3' |
| cg19603903               | Forward  | 5'-      | [Biotin]-GGGAATTTTGGATTGAGGTT           | -3' |
|                          | Reverse  | 5'-      | AAAATACTTCCTAACTA ACTCCTATTA ACT        | -3' |
|                          | Sequence | 5'-      | ACTCCTATTA ACTAAAATTCCT                 | -3' |
| cg06643849               | Forward  | 5'-      | TTAGTTAATAGGAGTTAGTTAGGAAGTAT           | -3' |
|                          | Reverse  | 5'-      | [Biotin]-CCTACTCCTCCTACAACCTCACTAATATC  | -3' |
|                          | Sequence | 5'-      | GTTGGTGTAGGGTATAAAAGA                   | -3' |
| cg15128510<br>cg25432232 | Forward  | 5'-      | GTGGGAGGAGAGGGGTAA                      | -3' |
|                          | Reverse  | 5'-      | [Biotin]-CCCAAACCTTACTTCA               | -3' |
|                          | Sequence | 5'-      | GGAGAGTGGTTTGAAT                        | -3' |
| cg23371413               | Forward  | 5'-      | TAGTTAATAGGAGTTAGTTAGGAAGTAT            | -3' |
|                          | Reverse  | 5'-      | [Biotin]-CCTACTCCTCCTACAACCTCACTAATATC  | -3' |
|                          | Sequence | 5'-      | GGAGTTAGTTAGGAAGTATT                    | -3' |
| cg22711741               | Forward  | 5'-      | AGTTAATAGGAGTTAGTTAGGAAGTAT             | -3' |
|                          | Reverse  | 5'-      | [Biotin]-TCCTACTCCTCCTACAACCTCACTAATATC | -3' |
|                          | Sequence | 5'-      | GTAGTTAAGGTTGTTT                        | -3' |
| cg26730619               | Forward  | 5'-      | GAAGGGAAAGAGGTAGAGGAAGGATAT             | -3' |
|                          | Reverse  | 5'-      | [Biotin]-CTTTCCTTAAACCCAACCAATACACATTC  | -3' |
|                          | Sequence | 5'-      | GTTAGGAGGAGTTTATAGT                     | -3' |
| cg25067162               | Forward  | 5'-      | GAAATTGTAGTTTTATGGAGAGGAATATT           | -3' |
|                          | Reverse  | 5'-      | [Biotin]-AACATAACTCCAATCCATAACT         | -3' |
|                          | Sequence | 5'-      | GGATAGATTGGAGATTTG                      | -3' |
| cg02286533               | Forward  | 5'-      | TGTTTGGGGTAGGGGAAAT                     | -3' |
|                          | Reverse  | 5'-      | [Biotin]-CCTCAAACCAACCAACCAATTAAC       | -3' |

Mano *et al.*

AD neuronal methylome reveals BRCA1 aggregation

Supporting Information Appendix

|            |          |     |                                        |     |
|------------|----------|-----|----------------------------------------|-----|
|            | Sequence | 5'- | GGGGTAGGGGAAATG                        | -3' |
| cg16006004 | Forward  | 5'- | TTGTTTGGGGTAGGGGAAAT                   | -3' |
|            | Reverse  | 5'- | [Biotin]-CCAAAAAATTA ACTCTTACCACTTATCC | -3' |
|            | Sequence | 5'- | TTTTAGTTTTAGTGT TTGTTATTTT             | -3' |
| cg26276233 | Forward  | 5'- | TGGGGTAAGTAGTTTTGT AAGG                | -3' |
|            | Reverse  | 5'- | [Biotin]-CATAAACCAAAACCCATTTCCCCTACCC  | -3' |
|            | Sequence | 5'- | GGTAAGTAGTTTTGT AAGGT                  | -3' |
| cg06001716 | Forward  | 5'- | AGTTTGGGGTAAGTAGTTTTGT A               | -3' |
|            | Reverse  | 5'- | [Biotin]-CATAAACCAAAACCCATTTCCCCTACCC  | -3' |
|            | Sequence | 5'- | GTAAGGTTAGTGGTTTG                      | -3' |
| cg18372208 | Forward  | 5'- | [Biotin]-AGGAGTTTGGGGTAAGTAGT          | -3' |
|            | Reverse  | 5'- | TCCCTCAA AACCAACCACCCCATTA             | -3' |
|            | Sequence | 5'- | TTGTTATTTTTAGGGTTTAGTTTG               | -3' |
| cg14687474 | Forward  | 5'- | [Biotin]-TGTTTGGGGTAGGGGAAATG          | -3' |
|            | Reverse  | 5'- | CCAAAAAATTA ACTCTTACCACTTATCC          | -3' |
|            | Sequence | 5'- | CCACCCCATTA ACTAAT                     | -3' |
| cg01483656 | Forward  | 5'- | GGGAGGAAGTTTTGTTTGAGAA                 | -3' |
|            | Reverse  | 5'- | [Biotin]-ATTAAATAACTTTTAAAACCCACCTT    | -3' |
|            | Sequence | 5'- | GATTATATTTTTGTTATTTAGGGT               | -3' |
| cg15174294 | Forward  | 5'- | GGGAAGGGGAGGGTTGT AAG                  | -3' |
|            | Reverse  | 5'- | [Biotin]-CCCTCCAATAATCCCTACACAATC      | -3' |
|            | Sequence | 5'- | AGGTTTTTTAGTAGTTAATTTTATA              | -3' |
| cg09352518 | Forward  | 5'- | GGGAAGGGGAGGGTTGT AAG                  | -3' |
|            | Reverse  | 5'- | [Biotin]-CCCTCCAATAATCCCTACACAATC      | -3' |
|            | Sequence | 5'- | AGGTTTTTTAGTAGTTAATTTTATA              | -3' |

Mano *et al.*  
AD neuronal methylome reveals BRCA1 aggregation  
Supporting Information Appendix

**Table S5**

Pyrosequencing primers used for analysis of murine *Brcal* promoter. Forward and Reverse are initial PCR primers and Sequence corresponds to sequencing primers. [Biotin] corresponds to biotinylated primer.

| CpG #  | Distance from TSS (bp) | Purpose  | Sequence |                                         |     |
|--------|------------------------|----------|----------|-----------------------------------------|-----|
| #1     | 15                     | Forward  | 5'-      | GAGGTGTTGGATTTTTTGGTTGTA                | -3' |
|        |                        | Reverse  | 5'-      | [Biotin]-CCCCAACTCCCTCCTCCCTTC          | -3' |
|        |                        | Sequence | 5'-      | AGTTTTTAGGAATATAAGATTTAGA               | -3' |
| #2     | 503                    | Forward  | 5'-      | AGTGTAGTTTTAAGGGAAAAGAGTTT              | -3' |
|        |                        | Reverse  | 5'-      | [Biotin]-ACCCACAACCTCTTTAATCTA          | -3' |
|        |                        | Sequence | 5'-      | AGGTAAGAGTATTATAGGAATTTAG               | -3' |
| #3     | 620                    | Forward  | 5'-      | AGTTGTGGGTTTTAGGAAGATTAT                | -3' |
|        |                        | Reverse  | 5'-      | [Biotin]-TTTCCCAAACCCATTAACCACCTCTACTT  | -3' |
|        |                        | Sequence | 5'-      | GGGTTTTAGGAAGATTATAATT                  | -3' |
| #4     | 720                    | Forward  | 5'-      | TGATTTGGGAAAAGTAGAGGG                   | -3' |
|        |                        | Reverse  | 5'-      | [Biotin]-TATCTACCCCTCAAATAACCTCTCTAC    | -3' |
|        |                        | Sequence | 5'-      | GGGAAAGGGAAATTTAATTAG                   | -3' |
| #5     | 797                    | Forward  | 5'-      | ATGTTAGTGATTTGGGAAAAGTAGA               | -3' |
|        |                        | Reverse  | 5'-      | [Biotin]-CCACAAAATAATTAACCTCTTCTATCTACC | -3' |
|        |                        | Sequence | 5'-      | AGAGTTTTTGTTTTTTTTTTTGTAA               | -3' |
| #6, #7 | 893, 904               | Forward  | 5'-      | TGGAAAATTTAGGGAAATATGGGATTAGG           | -3' |
|        |                        | Reverse  | 5'-      | [Biotin]-ACCCCTACTTCTAAATAACAATAATAACTT | -3' |
|        |                        | Sequence | 5'-      | GGAAATATGGGATTAGGT                      | -3' |
| #8, #9 | 938, 949               | Forward  | 5'-      | GAGAGGTTATTTTGAGGGGTAGATAGAAAG          | -3' |
|        |                        | Reverse  | 5'-      | [Biotin]-CCCTAAACACCAAAAATCACTCCTCTTTAC | -3' |
|        |                        | Sequence | 5'-      | AGATTTATTTAGTAGGGATAGTAG                | -3' |

Mano *et al.*  
 AD neuronal methylome reveals BRCA1 aggregation  
 Supporting Information Appendix

**Table S6**

Sequencing primers used for analysis of *TREM2* variants. Forward and Reverse are initial PCR

primers and Sequence corresponds to sequencing primers (seq).

| Variants                                          | Purpose   | Sequence |                                        |
|---------------------------------------------------|-----------|----------|----------------------------------------|
| L211P                                             | PCR1      | 5'-      | GCCAAGTGGCAAGTATGCAGGC -3'             |
|                                                   | PCR2, seq | 5'-      | GGCTGGTCCCTGGTGGGACTTC -3'             |
|                                                   | PCR2, seq | 5'-      | CCTGAGAGAAGATTCTAATCTGTAGGCC -3'       |
|                                                   | PCR1      | 5'-      | GTCCTGGTTTCTCCCCATTCCCTG -3'           |
| H157Y,<br>R136Q                                   | PCR1      | 5'-      | ACTAACTAACATGTAGCAGCTGGTGG -3'         |
|                                                   | PCR2, seq | 5'-      | GGAGGGGTGTTTACATAAGAGATATCCAGGGCCC -3' |
|                                                   | PCR1      | 5'-      | AATGACCTGATCCACATAGGACCAG -3'          |
|                                                   | PCR2      | 5'-      | CCCACCCATAAAGGTTCTCCCGCC -3'           |
| R98W,<br>T96K,<br>D87N                            | PCR2, seq | 5'-      | TTCCCAGGATCCCTGAGAGCC -3'              |
|                                                   | PCR1      | 5'-      | GTAGGGAGATGAGACCATACGATGGGTTTTCCC -3'  |
|                                                   | PCR1      | 5'-      | CCAGTCCCTGCAGGTGTCTTG -3'              |
|                                                   | PCR2      | 5'-      | AGCCCACAACACCACAGTGTTCCAGGG -3'        |
| N68K,<br>T66M,<br>R62H,<br>R47H,<br>Y38C,<br>Q33X | PCR, seq  | 5'-      | GCATCATGGGGTTGTAGATTCCGC -3'           |
|                                                   | PCR       | 5'-      | AAACACATGCTGTGCCATCCGC -3'             |



Mano *et al.*  
 AD neuronal methylome reveals BRCA1 aggregation  
 Supporting Information Appendix

**Table S7**

Result of Infinium methylome analysis of AD related genes.

CHR: chromosome number, MAPINFO: Chromosomal coordinates of the CpG, arm: chromosome

arm, feature and CpG islands are defined by Illumina.  $\beta$ value NC-AD:  $\beta$ value of average AD was

subtracted from average of NC samples. P value was calculated by one-sided *t*-test. TSS:

transcription start site. UTR: untranslated region. IGR: intergenic region.

| CpG #      | CHR | MAPINFO | arm | gene         | feature | CpG islands | $\beta$ value NC-AD | P value (one-sided <i>t</i> -test) |
|------------|-----|---------|-----|--------------|---------|-------------|---------------------|------------------------------------|
| cg06730721 | 19  | 1039831 | p   | <i>ABCA7</i> | TSS1500 | island      | 0.00017999          | 0.45379528                         |
| cg26263477 | 19  | 1039863 | p   | <i>ABCA7</i> | TSS1500 | island      | -0.001005821        | 0.373346683                        |
| cg05504606 | 19  | 1039871 | p   | <i>ABCA7</i> | TSS1500 | island      | -0.011745041        | 0.068207296                        |
| cg26264438 | 19  | 1039942 | p   | <i>ABCA7</i> | TSS200  | island      | 0.001548543         | 0.195717304                        |
| cg07726048 | 19  | 1039944 | p   | <i>ABCA7</i> | TSS200  | island      | 0.00278492          | 0.122175098                        |
| cg21590311 | 19  | 1040077 | p   | <i>ABCA7</i> | TSS200  | island      | 0.003282857         | 0.064198412                        |
| cg10749413 | 19  | 1041020 | p   | <i>ABCA7</i> | 5'UTR   | shore       | -0.00253345         | 0.21414373                         |
| cg05989429 | 19  | 1041026 | p   | <i>ABCA7</i> | 5'UTR   | shore       | -0.001579918        | 0.239462832                        |
| cg23027715 | 19  | 1045096 | p   | <i>ABCA7</i> | Body    | shore       | -0.002253812        | 0.362483171                        |
| cg02817925 | 19  | 1046325 | p   | <i>ABCA7</i> | Body    | island      | -0.000401564        | 0.444115291                        |
| cg06169110 | 19  | 1046615 | p   | <i>ABCA7</i> | Body    | island      | 0.001359184         | 0.407259833                        |
| cg02253236 | 19  | 1046996 | p   | <i>ABCA7</i> | Body    | island      | 0.001941582         | 0.270070625                        |
| cg02959678 | 19  | 1047604 | p   | <i>ABCA7</i> | Body    | island      | 0.002095005         | 0.271380517                        |
| cg02807077 | 19  | 1049287 | p   | <i>ABCA7</i> | Body    | shore       | 0.006115872         | 0.025896164                        |
| cg23657707 | 19  | 1050977 | p   | <i>ABCA7</i> | Body    | island      | 0.001282284         | 0.234220846                        |
| cg10406526 | 19  | 1051079 | p   | <i>ABCA7</i> | Body    | island      | 0.000652641         | 0.454813387                        |
| cg00874873 | 19  | 1051160 | p   | <i>ABCA7</i> | Body    | island      | 9.32E-05            | 0.48522457                         |
| cg18529892 | 19  | 1052159 | p   | <i>ABCA7</i> | Body    | shore       | 0.000285157         | 0.484054583                        |
| cg24145486 | 19  | 1054884 | p   | <i>ABCA7</i> | Body    | shelf       | 0.002506596         | 0.24958472                         |
| cg02986791 | 19  | 1062178 | p   | <i>ABCA7</i> | Body    | shore       | 0.00399009          | 0.284496958                        |
| cg21995147 | 19  | 1064017 | p   | <i>ABCA7</i> | Body    | island      | -0.00613838         | 0.148319753                        |

|            |    |          |   |              |         |          |              |             |
|------------|----|----------|---|--------------|---------|----------|--------------|-------------|
| cg12082025 | 19 | 1064218  | p | <i>ABCA7</i> | Body    | island   | -0.010782148 | 0.277005066 |
| cg26576206 | 19 | 1064938  | p | <i>ABCA7</i> | Body    | island   | 0.011564149  | 0.254780086 |
| cg13761375 | 19 | 1065184  | p | <i>ABCA7</i> | Body    | island   | 0.001011592  | 0.366001791 |
| cg11363615 | 8  | 41507621 | p | <i>ANK1</i>  | IGR     | island   | -0.004450573 | 0.18446204  |
| cg21468634 | 8  | 41507844 | p | <i>ANK1</i>  | IGR     | island   | 0.002183274  | 0.161299331 |
| cg15649474 | 8  | 41507852 | p | <i>ANK1</i>  | IGR     | island   | 0.002747945  | 0.052292338 |
| cg25670429 | 8  | 41507937 | p | <i>ANK1</i>  | IGR     | shore    | 0.002364873  | 0.157759376 |
| cg20677018 | 8  | 41508391 | p | <i>ANK1</i>  | IGR     | shore    | 0.001581652  | 0.315736368 |
| cg07161603 | 8  | 41508618 | p | <i>ANK1</i>  | IGR     | shore    | -0.002310296 | 0.36098446  |
| cg19945060 | 8  | 41508779 | p | <i>ANK1</i>  | IGR     | shore    | -0.001946652 | 0.356982275 |
| cg21289397 | 8  | 41510988 | p | <i>ANK1</i>  | 3'UTR   | island   | 0.014195058  | 0.257695654 |
| cg24739382 | 8  | 41511175 | p | <i>ANK1</i>  | 3'UTR   | island   | 0.007277427  | 0.32907607  |
| cg07529534 | 8  | 41511314 | p | <i>ANK1</i>  | 3'UTR   | island   | 0.002608004  | 0.443163462 |
| cg24931737 | 8  | 41511709 | p | <i>ANK1</i>  | 3'UTR   | shore    | 0.008739961  | 0.212838904 |
| cg16140558 | 8  | 41514039 | p | <i>ANK1</i>  | 3'UTR   | shelf    | 0.004164877  | 0.237612713 |
| cg12148515 | 8  | 41517301 | p | <i>ANK1</i>  | 3'UTR   | open sea | 0.029189646  | 0.142472605 |
| cg13603914 | 8  | 41518004 | p | <i>ANK1</i>  | 3'UTR   | open sea | 0.007437259  | 0.120452283 |
| cg10794439 | 8  | 41518051 | p | <i>ANK1</i>  | 3'UTR   | open sea | 0.009695964  | 0.132856135 |
| cg17886457 | 8  | 41518134 | p | <i>ANK1</i>  | 3'UTR   | open sea | 0.001066058  | 0.446122347 |
| cg10715527 | 8  | 41518139 | p | <i>ANK1</i>  | 3'UTR   | open sea | -0.010455028 | 0.306858204 |
| cg04319844 | 8  | 41519026 | p | <i>ANK1</i>  | Body    | open sea | -0.003617636 | 0.360259961 |
| cg00328284 | 8  | 41519119 | p | <i>ANK1</i>  | Body    | open sea | 0.013667716  | 0.093711645 |
| cg05066959 | 8  | 41519308 | p | <i>ANK1</i>  | Body    | open sea | -0.003959589 | 0.267994153 |
| cg11823178 | 8  | 41519399 | p | <i>ANK1</i>  | Body    | open sea | 0.001460177  | 0.323494916 |
| cg12439423 | 8  | 41522721 | p | <i>ANK1</i>  | Body    | open sea | 0.001454951  | 0.411874729 |
| cg25043378 | 8  | 41522857 | p | <i>ANK1</i>  | TSS200  | open sea | 0.008482586  | 0.258922545 |
| cg01678292 | 8  | 41522873 | p | <i>ANK1</i>  | TSS200  | open sea | -0.001910697 | 0.424271546 |
| cg11479568 | 8  | 41522951 | p | <i>ANK1</i>  | TSS200  | open sea | 0.001564098  | 0.399662619 |
| cg13432087 | 8  | 41523480 | p | <i>ANK1</i>  | TSS1500 | open sea | -0.000391706 | 0.48554443  |
| cg12003463 | 8  | 41523968 | p | <i>ANK1</i>  | TSS1500 | open sea | 0.001258111  | 0.454447344 |
| cg11912315 | 8  | 41528946 | p | <i>ANK1</i>  | Body    | open sea | 0.008649238  | 0.268611002 |
| cg05986168 | 8  | 41529109 | p | <i>ANK1</i>  | Body    | open sea | 0.023140221  | 0.009343593 |
| cg19441908 | 8  | 41529140 | p | <i>ANK1</i>  | Body    | open sea | 0.008087102  | 0.15598381  |
| cg17103638 | 8  | 41542140 | p | <i>ANK1</i>  | Body    | open sea | -0.000975056 | 0.358605592 |
| cg26697310 | 8  | 41542172 | p | <i>ANK1</i>  | Body    | open sea | 0.000171481  | 0.481554322 |
| cg22532314 | 8  | 41546072 | p | <i>ANK1</i>  | Body    | open sea | -0.004272786 | 0.387306899 |
| cg09897002 | 8  | 41553955 | p | <i>ANK1</i>  | Body    | open sea | 0.001999383  | 0.303998403 |

|            |   |          |   |             |      |          |              |             |
|------------|---|----------|---|-------------|------|----------|--------------|-------------|
| cg09576978 | 8 | 41554080 | p | <i>ANK1</i> | Body | open sea | 0.003286312  | 0.233424382 |
| cg08388995 | 8 | 41554149 | p | <i>ANK1</i> | Body | open sea | 0.002100339  | 0.290528088 |
| cg14445914 | 8 | 41556933 | p | <i>ANK1</i> | Body | shelf    | 0.006366526  | 0.100442234 |
| cg11696388 | 8 | 41557540 | p | <i>ANK1</i> | Body | shore    | 0.002224231  | 0.391249331 |
| cg05234958 | 8 | 41557710 | p | <i>ANK1</i> | Body | shore    | 0.002658832  | 0.292433943 |
| cg08786207 | 8 | 41559303 | p | <i>ANK1</i> | Body | island   | -0.001950782 | 0.242319537 |
| cg02712294 | 8 | 41559393 | p | <i>ANK1</i> | Body | island   | -0.005604845 | 0.155752791 |
| cg07533533 | 8 | 41559593 | p | <i>ANK1</i> | Body | island   | 0.011778219  | 0.158569847 |
| cg20464175 | 8 | 41559903 | p | <i>ANK1</i> | Body | shore    | 0.029513596  | 0.019342829 |
| cg07680965 | 8 | 41563429 | p | <i>ANK1</i> | Body | shelf    | -0.009304953 | 0.224730719 |
| cg13152952 | 8 | 41570554 | p | <i>ANK1</i> | Body | open sea | -0.002824177 | 0.258629514 |
| cg10601625 | 8 | 41570622 | p | <i>ANK1</i> | Body | open sea | 0.001390613  | 0.343883968 |
| cg27260174 | 8 | 41576763 | p | <i>ANK1</i> | Body | open sea | -0.0003045   | 0.478757541 |
| cg18491744 | 8 | 41580834 | p | <i>ANK1</i> | Body | shelf    | 0.027601145  | 0.122622391 |
| cg04236786 | 8 | 41580903 | p | <i>ANK1</i> | Body | shelf    | 0.012793139  | 0.090395875 |
| cg13609385 | 8 | 41580932 | p | <i>ANK1</i> | Body | shelf    | 0.014830467  | 0.213813265 |
| cg05538980 | 8 | 41581845 | p | <i>ANK1</i> | Body | shore    | -0.00022215  | 0.471832455 |
| cg27619646 | 8 | 41583018 | p | <i>ANK1</i> | Body | shore    | 0.00203362   | 0.349350659 |
| cg27650870 | 8 | 41583136 | p | <i>ANK1</i> | Body | island   | 0.01137301   | 0.200560565 |
| cg15706250 | 8 | 41583321 | p | <i>ANK1</i> | Body | island   | 0.005011937  | 0.334310927 |
| cg19537719 | 8 | 41583498 | p | <i>ANK1</i> | Body | island   | -0.00049486  | 0.456796338 |
| cg18614735 | 8 | 41583523 | p | <i>ANK1</i> | Body | island   | 0.006933331  | 0.241569434 |
| cg03755522 | 8 | 41585237 | p | <i>ANK1</i> | Body | shore    | 0.002651053  | 0.317757122 |
| cg17182837 | 8 | 41585554 | p | <i>ANK1</i> | Body | shelf    | -0.002490254 | 0.391794856 |
| cg10116189 | 8 | 41588560 | p | <i>ANK1</i> | Body | open sea | 0.003413594  | 0.11516337  |
| cg20468415 | 8 | 41592973 | p | <i>ANK1</i> | Body | open sea | -0.013446723 | 0.21137276  |
| cg27016366 | 8 | 41604672 | p | <i>ANK1</i> | Body | open sea | 0.011411494  | 0.320580557 |
| cg07889469 | 8 | 41624634 | p | <i>ANK1</i> | Body | island   | 0.000922277  | 0.420095585 |
| cg07162571 | 8 | 41624841 | p | <i>ANK1</i> | Body | island   | 0.009344813  | 0.031787639 |
| cg09125812 | 8 | 41625127 | p | <i>ANK1</i> | Body | island   | 0.004973601  | 0.060696467 |
| cg05522554 | 8 | 41625190 | p | <i>ANK1</i> | Body | island   | 0.001483497  | 0.25406554  |
| cg07235638 | 8 | 41625417 | p | <i>ANK1</i> | Body | shore    | 0.001872695  | 0.26486281  |
| cg24128389 | 8 | 41625579 | p | <i>ANK1</i> | Body | shore    | 0.002388536  | 0.407968655 |
| cg08521995 | 8 | 41628237 | p | <i>ANK1</i> | Body | shelf    | 0.004325531  | 0.348577709 |
| cg05885688 | 8 | 41628552 | p | <i>ANK1</i> | Body | shelf    | 0.008481861  | 0.32981136  |
| cg19442889 | 8 | 41639488 | p | <i>ANK1</i> | Body | open sea | -0.000984897 | 0.316015351 |
| cg17256609 | 8 | 41643375 | p | <i>ANK1</i> | Body | open sea | -0.001566596 | 0.433599625 |

|            |   |          |   |             |         |          |              |             |
|------------|---|----------|---|-------------|---------|----------|--------------|-------------|
| cg20263686 | 8 | 41643429 | p | <i>ANK1</i> | Body    | open sea | 0.000872027  | 0.459022606 |
| cg11059357 | 8 | 41649676 | p | <i>ANK1</i> | Body    | open sea | 0.024789362  | 0.040425683 |
| cg09997356 | 8 | 41651695 | p | <i>ANK1</i> | Body    | shelf    | -0.000150713 | 0.471834265 |
| cg26172342 | 8 | 41654331 | p | <i>ANK1</i> | Body    | shore    | 0.002374529  | 0.281903269 |
| cg08923054 | 8 | 41654455 | p | <i>ANK1</i> | Body    | shore    | 0.00423139   | 0.146368771 |
| cg14030674 | 8 | 41654557 | p | <i>ANK1</i> | Body    | shore    | 0.002838377  | 0.204417983 |
| cg00176210 | 8 | 41654967 | p | <i>ANK1</i> | Body    | island   | 0.00642268   | 0.155408513 |
| cg26326633 | 8 | 41655078 | p | <i>ANK1</i> | 1stExon | island   | 0.012883152  | 0.128494042 |
| cg08194989 | 8 | 41655154 | p | <i>ANK1</i> | TSS200  | island   | 0.009509336  | 0.096388952 |
| cg14904662 | 8 | 41655673 | p | <i>ANK1</i> | TSS1500 | island   | 0.002703537  | 0.373769821 |
| cg25154801 | 8 | 41655826 | p | <i>ANK1</i> | TSS1500 | island   | 0.023108107  | 0.06730583  |
| cg00783104 | 8 | 41655894 | p | <i>ANK1</i> | TSS1500 | island   | 0.026978682  | 0.105079444 |
| cg04153489 | 8 | 41655983 | p | <i>ANK1</i> | TSS1500 | island   | 0.003916102  | 0.349377841 |
| cg08894480 | 8 | 41659962 | p | <i>ANK1</i> | Body    | shelf    | -0.017623122 | 0.123275056 |
| cg02716401 | 8 | 41668188 | p | <i>ANK1</i> | Body    | open sea | 0.008166447  | 0.175630941 |
| cg03493932 | 8 | 41668449 | p | <i>ANK1</i> | Body    | open sea | -0.003786802 | 0.328302025 |
| cg21132564 | 8 | 41675568 | p | <i>ANK1</i> | Body    | open sea | 0.003507371  | 0.337710007 |
| cg19997384 | 8 | 41685595 | p | <i>ANK1</i> | Body    | shore    | 0.002500937  | 0.428683478 |
| cg12292531 | 8 | 41685719 | p | <i>ANK1</i> | Body    | shore    | 0.003977701  | 0.119621721 |
| cg02172579 | 8 | 41685992 | p | <i>ANK1</i> | Body    | island   | 0.011705249  | 0.040837714 |
| cg03596181 | 8 | 41686111 | p | <i>ANK1</i> | Body    | island   | 0.00416683   | 0.154082422 |
| cg10470489 | 8 | 41686324 | p | <i>ANK1</i> | Body    | island   | 0.015051106  | 0.17668803  |
| cg11207534 | 8 | 41686438 | p | <i>ANK1</i> | Body    | island   | -0.005879258 | 0.306260825 |
| cg16129172 | 8 | 41686467 | p | <i>ANK1</i> | Body    | island   | 0.007249574  | 0.177465188 |
| cg12180191 | 8 | 41686706 | p | <i>ANK1</i> | Body    | shore    | 0.019221324  | 0.087529474 |
| cg15133790 | 8 | 41689378 | p | <i>ANK1</i> | Body    | shelf    | -0.013205464 | 0.25748516  |
| cg14354820 | 8 | 41691767 | p | <i>ANK1</i> | Body    | open sea | 0.008662453  | 0.341575475 |
| cg22845790 | 8 | 41694003 | p | <i>ANK1</i> | Body    | open sea | 0.009098118  | 0.129630967 |
| cg27479267 | 8 | 41703005 | p | <i>ANK1</i> | Body    | open sea | 0.006439856  | 0.380758931 |
| cg21342785 | 8 | 41707516 | p | <i>ANK1</i> | Body    | open sea | -0.021838159 | 0.133240445 |
| cg02231197 | 8 | 41730737 | p | <i>ANK1</i> | Body    | shelf    | -0.001386048 | 0.40473386  |
| cg21470142 | 8 | 41732895 | p | <i>ANK1</i> | Body    | shore    | -0.00030653  | 0.483037819 |
| cg08604534 | 8 | 41733475 | p | <i>ANK1</i> | Body    | shore    | -0.000955811 | 0.391653024 |
| cg25052664 | 8 | 41733652 | p | <i>ANK1</i> | Body    | island   | 0.020017611  | 0.128801778 |
| cg24800880 | 8 | 41733711 | p | <i>ANK1</i> | Body    | island   | -0.002255279 | 0.351559929 |
| cg02392634 | 8 | 41733831 | p | <i>ANK1</i> | Body    | island   | 0.012009909  | 0.108970103 |
| cg06812861 | 8 | 41739738 | p | <i>ANK1</i> | Body    | open sea | -0.021109286 | 0.116177268 |

|               |    |          |   |             |         |          |              |             |
|---------------|----|----------|---|-------------|---------|----------|--------------|-------------|
| cg22746182    | 8  | 41749867 | p | <i>ANK1</i> | Body    | shelf    | -0.005121542 | 0.339682557 |
| cg00583328    | 8  | 41753348 | p | <i>ANK1</i> | Body    | island   | 0.034643122  | 0.049902289 |
| cg09405790    | 8  | 41753440 | p | <i>ANK1</i> | Body    | island   | 0.007104946  | 0.17443457  |
| cg05166490    | 8  | 41754172 | p | <i>ANK1</i> | 1stExon | island   | 0.000355871  | 0.408897978 |
| cg17331296    | 8  | 41754181 | p | <i>ANK1</i> | 1stExon | island   | -0.000927651 | 0.386073746 |
| cg19585816    | 8  | 41754742 | p | <i>ANK1</i> | TSS1500 | island   | 0.003786765  | 0.263731411 |
| cg19891728    | 8  | 41754871 | p | <i>ANK1</i> | TSS1500 | island   | 0.000617664  | 0.397804689 |
| cg20676100    | 8  | 41754928 | p | <i>ANK1</i> | TSS1500 | island   | -0.003394838 | 0.119560359 |
| cg01616178    | 8  | 41755140 | p | <i>ANK1</i> | TSS1500 | island   | 0.002141502  | 0.361210015 |
| cg19844326    | 8  | 41755409 | p | <i>ANK1</i> | TSS1500 | shore    | 0.005524073  | 0.190423751 |
| cg14123992    | 19 | 45407868 | q | <i>APOE</i> | TSS1500 | shelf    | 0.013610372  | 0.019681845 |
| cg04406254    | 19 | 45407945 | q | <i>APOE</i> | TSS1500 | shelf    | 0.009598514  | 0.227117301 |
| cg01032398    | 19 | 45408121 | q | <i>APOE</i> | TSS1500 | shelf    | -0.007675741 | 0.02287373  |
| cg12049787    | 19 | 45409080 | q | <i>APOE</i> | 1stExon | shelf    | 0.006881376  | 0.104293105 |
| cg08955609    | 19 | 45409353 | q | <i>APOE</i> | 5'UTR   | shelf    | 0.000681538  | 0.334164842 |
| cg18768621    | 19 | 45409440 | q | <i>APOE</i> | 5'UTR   | shelf    | 0.005887273  | 0.083864114 |
| cg19514613    | 19 | 45409713 | q | <i>APOE</i> | 5'UTR   | shelf    | 0.011238653  | 0.040187938 |
| cg06750524    | 19 | 45409955 | q | <i>APOE</i> | Body    | shore    | 0.006783652  | 0.240673598 |
| cg05501958    | 19 | 45411873 | q | <i>APOE</i> | Body    | island   | -0.005043801 | 0.25576148  |
| cg18799241    | 19 | 45412599 | q | <i>APOE</i> | 3'UTR   | island   | -0.000543906 | 0.459702989 |
| cg21879725    | 19 | 45412647 | q | <i>APOE</i> | 3'UTR   | shore    | -0.005588893 | 0.078615636 |
| cg13965133    | 21 | 27228125 | q | <i>APP</i>  | IGR     | open sea | -0.005894199 | 0.33259425  |
| cg21000999    | 21 | 27253974 | q | <i>APP</i>  | 3'UTR   | open sea | -0.003070302 | 0.435845125 |
| ch.21.228978R | 21 | 27297434 | q | <i>APP</i>  | Body    | open sea | 0.013018012  | 0.120404367 |
| cg25314245    | 21 | 27354743 | q | <i>APP</i>  | Body    | open sea | -0.00798937  | 0.137081747 |
| cg24168308    | 21 | 27372387 | q | <i>APP</i>  | Body    | open sea | 0.002389075  | 0.29792489  |
| cg11321156    | 21 | 27372396 | q | <i>APP</i>  | Body    | open sea | -0.002706372 | 0.322585901 |
| cg23269692    | 21 | 27372446 | q | <i>APP</i>  | Body    | open sea | -0.003020086 | 0.284993369 |
| cg18274664    | 21 | 27372461 | q | <i>APP</i>  | Body    | open sea | -0.000123335 | 0.489541593 |
| cg14414154    | 21 | 27538021 | q | <i>APP</i>  | Body    | shelf    | -0.006180272 | 0.3192913   |
| cg01286133    | 21 | 27540106 | q | <i>APP</i>  | Body    | shore    | 0.009328951  | 0.212475432 |
| cg19788250    | 21 | 27540220 | q | <i>APP</i>  | Body    | shore    | 0.005708015  | 0.20527451  |
| cg18597421    | 21 | 27540728 | q | <i>APP</i>  | Body    | shore    | -0.001294782 | 0.444474004 |
| cg12144476    | 21 | 27541894 | q | <i>APP</i>  | Body    | island   | 0.001562089  | 0.273654794 |
| cg10129201    | 21 | 27542749 | q | <i>APP</i>  | Body    | island   | -0.000900196 | 0.270797455 |
| cg13169373    | 21 | 27542843 | q | <i>APP</i>  | Body    | island   | 0.002840388  | 0.4173351   |
| cg15407086    | 21 | 27543045 | q | <i>APP</i>  | 1stExon | island   | -0.004729246 | 0.065266044 |

|            |    |           |   |             |         |          |              |             |
|------------|----|-----------|---|-------------|---------|----------|--------------|-------------|
| cg03779431 | 21 | 27543124  | q | <i>APP</i>  | 1stExon | island   | 0.001709356  | 0.146244138 |
| cg08015776 | 21 | 27543229  | q | <i>APP</i>  | TSS200  | island   | 0.001401846  | 0.177381019 |
| cg27372898 | 21 | 27543410  | q | <i>APP</i>  | TSS1500 | island   | 0.002734416  | 0.083217316 |
| cg08866780 | 21 | 27543523  | q | <i>APP</i>  | TSS1500 | island   | -0.00082172  | 0.424669872 |
| cg26153954 | 21 | 27543721  | q | <i>APP</i>  | TSS1500 | shore    | -0.001101875 | 0.43722838  |
| cg19707128 | 2  | 127635279 | q | <i>BINI</i> | IGR     | open sea | 0.002218409  | 0.446697581 |
| cg03741475 | 2  | 127635614 | q | <i>BINI</i> | IGR     | open sea | 0.004774612  | 0.172695159 |
| cg24164996 | 2  | 127635644 | q | <i>BINI</i> | IGR     | open sea | -0.005703359 | 0.255953421 |
| cg16909742 | 2  | 127635678 | q | <i>BINI</i> | IGR     | open sea | -0.003961273 | 0.27486291  |
| cg01390061 | 2  | 127642574 | q | <i>BINI</i> | IGR     | shore    | -0.012406344 | 0.152277897 |
| cg04202002 | 2  | 127643360 | q | <i>BINI</i> | IGR     | shore    | 0.004357572  | 0.219422422 |
| cg08535260 | 2  | 127643971 | q | <i>BINI</i> | IGR     | island   | 0.003646056  | 0.059326201 |
| cg23460843 | 2  | 127644075 | q | <i>BINI</i> | IGR     | island   | 0.008812835  | 0.185415209 |
| cg19738404 | 2  | 127644612 | q | <i>BINI</i> | IGR     | shore    | 0.008933026  | 0.299246814 |
| cg05736424 | 2  | 127646592 | q | <i>BINI</i> | IGR     | shelf    | -0.011810275 | 0.181863396 |
| cg02304361 | 2  | 127699673 | q | <i>BINI</i> | IGR     | open sea | 0.014917121  | 0.14275502  |
| cg03089864 | 2  | 127705908 | q | <i>BINI</i> | IGR     | open sea | -0.018932696 | 0.172956087 |
| cg17962090 | 2  | 127728910 | q | <i>BINI</i> | IGR     | shore    | 0.004219216  | 0.228971519 |
| cg20663365 | 2  | 127729097 | q | <i>BINI</i> | IGR     | shore    | 0.022493209  | 0.056658865 |
| cg08687025 | 2  | 127729123 | q | <i>BINI</i> | IGR     | shore    | -0.016347916 | 0.187191045 |
| cg22669787 | 2  | 127729597 | q | <i>BINI</i> | IGR     | shore    | -0.000703346 | 0.401097536 |
| cg17214616 | 2  | 127729681 | q | <i>BINI</i> | IGR     | island   | -0.00342061  | 0.197348763 |
| cg11527373 | 2  | 127729760 | q | <i>BINI</i> | IGR     | island   | 0.000415168  | 0.374268238 |
| cg15442262 | 2  | 127729904 | q | <i>BINI</i> | IGR     | island   | 0.003250366  | 0.167253303 |
| cg22009500 | 2  | 127729962 | q | <i>BINI</i> | IGR     | shore    | 0.012920872  | 0.113496932 |
| cg16988616 | 2  | 127732268 | q | <i>BINI</i> | IGR     | shelf    | 0.003232627  | 0.382555202 |
| cg03516358 | 2  | 127733882 | q | <i>BINI</i> | IGR     | shore    | -0.007219232 | 0.048037307 |
| cg14431024 | 2  | 127734416 | q | <i>BINI</i> | IGR     | island   | -0.004041577 | 0.162895365 |
| cg11657043 | 2  | 127734511 | q | <i>BINI</i> | IGR     | island   | 0.006716371  | 0.248131273 |
| cg02767024 | 2  | 127734676 | q | <i>BINI</i> | IGR     | island   | 0.002314617  | 0.388418918 |
| cg06006907 | 2  | 127734952 | q | <i>BINI</i> | IGR     | shore    | 0.004640283  | 0.207496292 |
| cg27228272 | 2  | 127772338 | q | <i>BINI</i> | IGR     | open sea | 0.005632243  | 0.379524943 |
| cg22762545 | 2  | 127774099 | q | <i>BINI</i> | IGR     | open sea | 0.001358385  | 0.370185694 |
| cg26829670 | 2  | 127780459 | q | <i>BINI</i> | IGR     | shelf    | -0.002989518 | 0.216148705 |
| cg08563189 | 2  | 127780654 | q | <i>BINI</i> | IGR     | shore    | 0.002713131  | 0.350730482 |
| cg19153828 | 2  | 127782651 | q | <i>BINI</i> | IGR     | island   | -0.010099519 | 0.015487939 |
| cg19590598 | 2  | 127782813 | q | <i>BINI</i> | IGR     | island   | -0.004670791 | 0.071672561 |

|            |   |           |   |             |         |          |              |             |
|------------|---|-----------|---|-------------|---------|----------|--------------|-------------|
| cg03766620 | 2 | 127783082 | q | <i>BINI</i> | IGR     | island   | 0.000175142  | 0.461867412 |
| cg22830113 | 2 | 127783168 | q | <i>BINI</i> | IGR     | island   | -0.00199706  | 0.321600812 |
| cg12632573 | 2 | 127783243 | q | <i>BINI</i> | IGR     | island   | 0.004561522  | 0.271268539 |
| cg02139871 | 2 | 127783370 | q | <i>BINI</i> | IGR     | shore    | 0.001389648  | 0.397089529 |
| cg21554034 | 2 | 127785512 | q | <i>BINI</i> | IGR     | shelf    | -0.004672686 | 0.283973701 |
| cg19954334 | 2 | 127791786 | q | <i>BINI</i> | IGR     | open sea | -0.006259297 | 0.212578718 |
| cg22883290 | 2 | 127800646 | q | <i>BINI</i> | IGR     | open sea | -0.025612666 | 0.15606573  |
| cg05942551 | 2 | 127801137 | q | <i>BINI</i> | IGR     | open sea | 0.002840389  | 0.201369211 |
| cg00824156 | 2 | 127801271 | q | <i>BINI</i> | IGR     | open sea | 0.002872364  | 0.292383681 |
| cg22768700 | 2 | 127805770 | q | <i>BINI</i> | 3'UTR   | open sea | 0.000752163  | 0.402810345 |
| cg02116471 | 2 | 127805855 | q | <i>BINI</i> | 3'UTR   | open sea | 0.002054093  | 0.337958069 |
| cg18981277 | 2 | 127805910 | q | <i>BINI</i> | 3'UTR   | open sea | 0.004930982  | 0.182631358 |
| cg24587400 | 2 | 127811805 | q | <i>BINI</i> | Body    | open sea | -0.016696681 | 0.167282146 |
| cg01441308 | 2 | 127811853 | q | <i>BINI</i> | Body    | open sea | -0.009219978 | 0.259456314 |
| cg22376361 | 2 | 127815133 | q | <i>BINI</i> | Body    | shelf    | 0.002586364  | 0.155007447 |
| cg06912356 | 2 | 127815206 | q | <i>BINI</i> | Body    | shelf    | -0.000606715 | 0.371699287 |
| cg05603944 | 2 | 127817030 | q | <i>BINI</i> | Body    | shore    | 0.001905983  | 0.312449409 |
| cg15356320 | 2 | 127818000 | q | <i>BINI</i> | Body    | island   | 0.013537865  | 0.145338254 |
| cg08663425 | 2 | 127818046 | q | <i>BINI</i> | Body    | island   | -0.000160598 | 0.495531539 |
| cg13293246 | 2 | 127818101 | q | <i>BINI</i> | Body    | island   | 0.008236263  | 0.111537696 |
| cg21427464 | 2 | 127818226 | q | <i>BINI</i> | Body    | island   | 0.014305595  | 0.03318228  |
| cg05842548 | 2 | 127821711 | q | <i>BINI</i> | Body    | shelf    | 0.007436553  | 0.25336363  |
| cg06021088 | 2 | 127822551 | q | <i>BINI</i> | Body    | open sea | 0.001856563  | 0.438485846 |
| cg24998649 | 2 | 127825935 | q | <i>BINI</i> | Body    | open sea | 0.007446347  | 0.233670164 |
| cg26467631 | 2 | 127826083 | q | <i>BINI</i> | Body    | open sea | 0.006346979  | 0.049595879 |
| cg05157961 | 2 | 127826149 | q | <i>BINI</i> | Body    | open sea | -0.001174346 | 0.324357298 |
| cg27405400 | 2 | 127839539 | q | <i>BINI</i> | Body    | open sea | 0.014673865  | 0.013780782 |
| cg04019522 | 2 | 127852450 | q | <i>BINI</i> | Body    | open sea | 0.008370651  | 0.263461205 |
| cg00436254 | 2 | 127862614 | q | <i>BINI</i> | Body    | shore    | 0.000339899  | 0.488875727 |
| cg00091827 | 2 | 127863656 | q | <i>BINI</i> | Body    | island   | -0.001592246 | 0.295534474 |
| cg07661177 | 2 | 127864026 | q | <i>BINI</i> | Body    | island   | 0.000213069  | 0.470167127 |
| cg04095651 | 2 | 127864359 | q | <i>BINI</i> | Body    | island   | 0.001930955  | 0.283227841 |
| cg23667267 | 2 | 127864762 | q | <i>BINI</i> | 1stExon | island   | 0.000159781  | 0.48283482  |
| cg10353870 | 2 | 127864778 | q | <i>BINI</i> | 1stExon | island   | -0.002311261 | 0.093474913 |
| cg22364819 | 2 | 127864926 | q | <i>BINI</i> | TSS200  | island   | 0.002340398  | 0.032449986 |
| cg23599640 | 2 | 127864941 | q | <i>BINI</i> | TSS200  | island   | 0.001547711  | 0.275335278 |
| cg14478610 | 2 | 127864964 | q | <i>BINI</i> | TSS200  | island   | 0.001574955  | 0.181286337 |

|            |    |           |   |              |         |          |              |             |
|------------|----|-----------|---|--------------|---------|----------|--------------|-------------|
| cg02446627 | 2  | 127865197 | q | <i>BIN1</i>  | TSS1500 | island   | 0.001029669  | 0.374303948 |
| cg07774478 | 2  | 127865245 | q | <i>BIN1</i>  | TSS1500 | island   | 0.003744745  | 0.329628393 |
| cg02161262 | 2  | 127865248 | q | <i>BIN1</i>  | TSS1500 | island   | -0.002463426 | 0.294543297 |
| cg25228746 | 2  | 127865379 | q | <i>BIN1</i>  | TSS1500 | shore    | -0.004498821 | 0.026644802 |
| cg08168897 | 2  | 127865431 | q | <i>BIN1</i>  | TSS1500 | shore    | -0.006173267 | 0.323560221 |
| cg06223080 | 2  | 127868745 | q | <i>BIN1</i>  | IGR     | shelf    | 0.007611822  | 0.338596183 |
| cg24331301 | 10 | 73156377  | q | <i>CDH23</i> | TSS1500 | island   | -0.004556098 | 0.322302753 |
| cg15323528 | 10 | 73156427  | q | <i>CDH23</i> | TSS1500 | island   | 0.013485901  | 0.170426915 |
| cg01000831 | 10 | 73156460  | q | <i>CDH23</i> | TSS1500 | island   | -0.004397375 | 0.270650874 |
| cg09796583 | 10 | 73156647  | q | <i>CDH23</i> | TSS200  | island   | -0.003581955 | 0.355063041 |
| cg18901116 | 10 | 73156858  | q | <i>CDH23</i> | 1stExon | island   | 0.000665519  | 0.435155583 |
| cg25798987 | 10 | 73157222  | q | <i>CDH23</i> | 5'UTR   | island   | -0.002505748 | 0.163513924 |
| cg22839123 | 10 | 73157611  | q | <i>CDH23</i> | 5'UTR   | island   | -0.000748018 | 0.38166625  |
| cg24094513 | 10 | 73157911  | q | <i>CDH23</i> | 5'UTR   | island   | 0.005585426  | 0.140066542 |
| cg01160241 | 10 | 73157953  | q | <i>CDH23</i> | 5'UTR   | island   | 0.000743128  | 0.434995942 |
| cg18608017 | 10 | 73158072  | q | <i>CDH23</i> | 5'UTR   | shore    | 0.009477919  | 0.224569293 |
| cg27017382 | 10 | 73160237  | q | <i>CDH23</i> | 5'UTR   | shelf    | 0.000888628  | 0.345189005 |
| cg00234046 | 10 | 73169245  | q | <i>CDH23</i> | 5'UTR   | open sea | -1.14E-05    | 0.497918356 |
| cg07835953 | 10 | 73202938  | q | <i>CDH23</i> | Body    | open sea | 0.00198415   | 0.302306077 |
| cg07975680 | 10 | 73225789  | q | <i>CDH23</i> | Body    | open sea | 0.005949765  | 0.176283325 |
| cg10684627 | 10 | 73288563  | q | <i>CDH23</i> | Body    | open sea | -0.006040322 | 0.225513013 |
| cg09728120 | 10 | 73300441  | q | <i>CDH23</i> | Body    | open sea | -0.006459754 | 0.070166423 |
| cg04457572 | 10 | 73303234  | q | <i>CDH23</i> | Body    | open sea | -0.000521705 | 0.412840391 |
| cg09501025 | 10 | 73312955  | q | <i>CDH23</i> | Body    | open sea | -0.004493351 | 0.202277216 |
| cg18947261 | 10 | 73321439  | q | <i>CDH23</i> | Body    | open sea | 0.000802956  | 0.420342267 |
| cg15077792 | 10 | 73324481  | q | <i>CDH23</i> | Body    | open sea | 0.000194958  | 0.491868346 |
| cg12830671 | 10 | 73335297  | q | <i>CDH23</i> | Body    | open sea | -0.000267849 | 0.476353521 |
| cg22630628 | 10 | 73337125  | q | <i>CDH23</i> | Body    | open sea | -0.00116943  | 0.426243773 |
| cg24124069 | 10 | 73369502  | q | <i>CDH23</i> | Body    | open sea | -0.000293471 | 0.480562954 |
| cg18645316 | 10 | 73381995  | q | <i>CDH23</i> | Body    | open sea | -0.000801658 | 0.480362589 |
| cg13714026 | 10 | 73385503  | q | <i>CDH23</i> | Body    | open sea | -0.011262067 | 0.292144508 |
| cg20283498 | 10 | 73387917  | q | <i>CDH23</i> | Body    | open sea | 0.002027256  | 0.294304647 |
| cg22763136 | 10 | 73395000  | q | <i>CDH23</i> | Body    | open sea | 0.007254555  | 0.186489328 |
| cg00462411 | 10 | 73401422  | q | <i>CDH23</i> | Body    | open sea | -0.00827624  | 0.247257031 |
| cg23867673 | 10 | 73404170  | q | <i>CDH23</i> | Body    | open sea | 0.004361369  | 0.366373108 |
| cg04161859 | 10 | 73404657  | q | <i>CDH23</i> | Body    | open sea | 0.000991899  | 0.479264295 |
| cg05523505 | 10 | 73405460  | q | <i>CDH23</i> | Body    | open sea | -0.000409468 | 0.468173582 |



|            |    |          |   |                  |         |          |              |             |
|------------|----|----------|---|------------------|---------|----------|--------------|-------------|
| cg04567334 | 10 | 73408185 | q | <i>CDH23</i>     | Body    | open sea | 0.007681571  | 0.170052862 |
| cg09598552 | 10 | 73417893 | q | <i>CDH23</i>     | Body    | open sea | 0.00296708   | 0.275338395 |
| cg03028769 | 10 | 73421791 | q | <i>CDH23</i>     | Body    | open sea | 0.002445703  | 0.236596507 |
| cg23104184 | 10 | 73437334 | q | <i>CDH23</i>     | Body    | open sea | 0.013709747  | 0.134454028 |
| cg22545027 | 10 | 73437363 | q | <i>CDH23</i>     | Body    | open sea | 0.015015566  | 0.070508817 |
| cg03033796 | 10 | 73445156 | q | <i>CDH23</i>     | Body    | open sea | -0.008444133 | 0.274744066 |
| cg17019070 | 10 | 73466639 | q | <i>CDH23</i>     | Body    | open sea | 0.001319579  | 0.264480363 |
| cg10505163 | 10 | 73466728 | q | <i>CDH23</i>     | Body    | open sea | -0.001055615 | 0.270868044 |
| cg18235465 | 10 | 73471634 | q | <i>C10orf105</i> | 3'UTR   | open sea | -0.005547154 | 0.397251501 |
| cg21369812 | 10 | 73471699 | q | <i>C10orf105</i> | 3'UTR   | open sea | 0.003569057  | 0.140647223 |
| cg07571519 | 10 | 73472315 | q | <i>C10orf105</i> | 3'UTR   | open sea | -0.000335184 | 0.463130246 |
| cg24457649 | 10 | 73472344 | q | <i>C10orf105</i> | 3'UTR   | open sea | -0.001080156 | 0.428549995 |
| cg15763670 | 10 | 73473235 | q | <i>C10orf105</i> | 3'UTR   | open sea | 0.038462792  | 0.014807087 |
| cg19988181 | 10 | 73478985 | q | <i>C10orf105</i> | 5'UTR   | open sea | -0.003171909 | 0.174591525 |
| cg08734090 | 10 | 73479514 | q | <i>C10orf105</i> | 1stExon | open sea | -0.003477327 | 0.291464684 |
| cg20390554 | 10 | 73479696 | q | <i>C10orf105</i> | 5'UTR   | open sea | -0.002032633 | 0.340288884 |
| cg09637449 | 10 | 73479754 | q | <i>C10orf105</i> | 5'UTR   | open sea | -0.004466277 | 0.16315138  |
| cg03456651 | 10 | 73479833 | q | <i>C10orf105</i> | 5'UTR   | open sea | -6.92E-05    | 0.494542955 |
| cg18668540 | 10 | 73479848 | q | <i>C10orf105</i> | 5'UTR   | open sea | -0.002681092 | 0.194356036 |
| cg05848785 | 10 | 73480942 | q | <i>C10orf105</i> | 5'UTR   | open sea | 0.00022297   | 0.472527778 |
| cg13740185 | 10 | 73486801 | q | <i>C10orf105</i> | 5'UTR   | open sea | -0.012858    | 0.170337592 |
| cg00418663 | 10 | 73491922 | q | <i>C10orf105</i> | 5'UTR   | open sea | -0.009377814 | 0.231376763 |
| cg22991379 | 10 | 73491943 | q | <i>C10orf105</i> | 5'UTR   | open sea | -0.000130974 | 0.496020405 |
| cg05979232 | 10 | 73496014 | q | <i>C10orf105</i> | 5'UTR   | open sea | -0.003540451 | 0.192542749 |
| cg10750182 | 10 | 73497514 | q | <i>C10orf105</i> | 5'UTR   | open sea | -0.000387536 | 0.476344861 |
| cg19429405 | 10 | 73497609 | q | <i>C10orf105</i> | TSS200  | open sea | -0.006096814 | 0.360376047 |
| cg23056923 | 10 | 73497629 | q | <i>C10orf105</i> | TSS200  | open sea | 0.000735981  | 0.435214166 |
| cg17422176 | 10 | 73497772 | q | <i>C10orf105</i> | TSS200  | open sea | -0.044581961 | 0.127242358 |
| cg26091131 | 10 | 73498624 | q | <i>C10orf105</i> | TSS1500 | open sea | -0.001349482 | 0.431841057 |
| cg24938210 | 10 | 73498640 | q | <i>C10orf105</i> | TSS1500 | open sea | 0.002000031  | 0.392109379 |
| cg01470340 | 10 | 73498766 | q | <i>C10orf105</i> | TSS1500 | open sea | -0.006232057 | 0.064574586 |
| cg04304802 | 10 | 73499965 | q | <i>CDH23</i>     | Body    | open sea | 0.013445501  | 0.052331706 |
| cg07676145 | 10 | 73506646 | q | <i>CDH23</i>     | Body    | open sea | -0.010803137 | 0.163999849 |
| cg05440642 | 10 | 73507806 | q | <i>C10orf54</i>  | 3'UTR   | open sea | 0.004033171  | 0.367515589 |
| cg04179740 | 10 | 73516760 | q | <i>CDH23</i>     | Body    | open sea | -0.002940851 | 0.426839182 |
| cg19227382 | 10 | 73521606 | q | <i>CDH23</i>     | Body    | open sea | -2.64E-05    | 0.496218557 |
| cg23968456 | 10 | 73521631 | q | <i>CDH23</i>     | Body    | open sea | -0.001084731 | 0.230733219 |

|            |    |          |   |                 |         |          |              |             |
|------------|----|----------|---|-----------------|---------|----------|--------------|-------------|
| cg09895190 | 10 | 73521645 | q | <i>CDH23</i>    | Body    | open sea | 0.001617691  | 0.399063501 |
| cg14916175 | 10 | 73529624 | q | <i>CDH23</i>    | Body    | shelf    | 0.005967547  | 0.345945983 |
| cg06768251 | 10 | 73533035 | q | <i>CDH23</i>    | Body    | shore    | 0.01999422   | 0.030866303 |
| cg13954090 | 10 | 73533106 | q | <i>CDH23</i>    | Body    | island   | 0.009050512  | 0.024008956 |
| cg13957721 | 10 | 73533304 | q | <i>C10orf54</i> | 5'UTR   | island   | 0.00146201   | 0.323738576 |
| cg12568633 | 10 | 73533407 | q | <i>CDH23</i>    | Body    | island   | -0.002859682 | 0.354268177 |
| cg04083751 | 10 | 73533414 | q | <i>CDH23</i>    | Body    | island   | -0.002973927 | 0.12572102  |
| cg09810750 | 10 | 73533449 | q | <i>CDH23</i>    | Body    | island   | -0.00011539  | 0.490623406 |
| cg14522427 | 10 | 73533468 | q | <i>CDH23</i>    | Body    | island   | -0.001667088 | 0.390922052 |
| cg17411913 | 10 | 73533483 | q | <i>CDH23</i>    | Body    | island   | -0.005631296 | 0.194285045 |
| cg06655361 | 10 | 73533561 | q | <i>C10orf54</i> | TSS1500 | shore    | 0.003306516  | 0.400397482 |
| cg24499627 | 10 | 73533891 | q | <i>C10orf54</i> | TSS1500 | shore    | -0.000613228 | 0.47722149  |
| cg23282441 | 10 | 73533927 | q | <i>C10orf54</i> | TSS1500 | shore    | -0.007789545 | 0.25358891  |
| cg06372475 | 10 | 73534286 | q | <i>C10orf54</i> | TSS1500 | shore    | 0.002985424  | 0.331174436 |
| cg11633461 | 10 | 73534338 | q | <i>C10orf54</i> | TSS1500 | shore    | 0.003249155  | 0.272633712 |
| cg24772501 | 10 | 73537481 | q | <i>CDH23</i>    | Body    | shelf    | 0.004227834  | 0.190122759 |
| cg22877524 | 10 | 73553138 | q | <i>CDH23</i>    | Body    | open sea | 0.001521436  | 0.333408203 |
| cg24980638 | 10 | 73553196 | q | <i>CDH23</i>    | Body    | open sea | 0.004484623  | 0.258387879 |
| cg07658681 | 10 | 73553201 | q | <i>CDH23</i>    | Body    | open sea | 0.002547517  | 0.401084036 |
| cg19906973 | 10 | 73562723 | q | <i>CDH23</i>    | Body    | shelf    | 0.000758081  | 0.420424289 |
| cg09229668 | 10 | 73565440 | q | <i>CDH23</i>    | Body    | shore    | 0.003099854  | 0.24479105  |
| cg17485681 | 10 | 73565625 | q | <i>CDH23</i>    | Body    | island   | 0.008037739  | 0.138382874 |
| cg08293528 | 10 | 73565688 | q | <i>CDH23</i>    | Body    | island   | 0.007050243  | 0.333525786 |
| cg23983208 | 10 | 73565812 | q | <i>CDH23</i>    | Body    | island   | 0.013246551  | 0.136982556 |
| cg17641566 | 10 | 73565966 | q | <i>CDH23</i>    | Body    | shore    | -0.003519586 | 0.37981238  |
| cg23284338 | 10 | 73569605 | q | <i>CDH23</i>    | Body    | shelf    | -0.00442148  | 0.143038667 |
| cg26134646 | 10 | 73569677 | q | <i>CDH23</i>    | Body    | shelf    | 0.001463355  | 0.207969712 |
| cg00613914 | 10 | 73569753 | q | <i>CDH23</i>    | Body    | shelf    | 0.004677139  | 0.079896139 |
| cg23119049 | 10 | 73572537 | q | <i>CDH23</i>    | Body    | open sea | 0.014437694  | 0.137338972 |
| cg05864024 | 10 | 73574855 | q | <i>CDH23</i>    | Body    | open sea | 0.002322233  | 0.359882804 |
| cg02851751 | 10 | 73574918 | q | <i>CDH23</i>    | Body    | open sea | -0.001015181 | 0.443455665 |
| cg19612504 | 10 | 73574943 | q | <i>CDH23</i>    | Body    | open sea | -0.001035576 | 0.421306949 |
| cg02180979 | 10 | 73575440 | q | <i>CDH23</i>    | 3'UTR   | open sea | 0.00075451   | 0.463684039 |
| cg05196905 | 21 | 47877665 | q | <i>DIP2A</i>    | TSS1500 | shore    | 0.033161994  | 0.012917904 |
| cg25539589 | 21 | 47877758 | q | <i>DIP2A</i>    | TSS1500 | shore    | 0.003201054  | 0.112706542 |
| cg26629188 | 21 | 47878281 | q | <i>DIP2A</i>    | TSS1500 | island   | 0.003574192  | 0.269585057 |
| cg19247551 | 21 | 47878552 | q | <i>DIP2A</i>    | TSS1500 | island   | 0.001083408  | 0.152128148 |

|               |    |           |   |              |         |          |              |             |
|---------------|----|-----------|---|--------------|---------|----------|--------------|-------------|
| cg15775835    | 21 | 47878727  | q | <i>DIP2A</i> | TSS200  | island   | 0.000405419  | 0.380968216 |
| cg12533308    | 21 | 47878746  | q | <i>DIP2A</i> | TSS200  | island   | -0.00129319  | 0.292710785 |
| cg11752103    | 21 | 47878969  | q | <i>DIP2A</i> | 1stExon | island   | 0.001823564  | 0.14256677  |
| cg03599110    | 21 | 47879272  | q | <i>DIP2A</i> | Body    | island   | -0.002781754 | 0.348502597 |
| cg13784482    | 21 | 47881507  | q | <i>DIP2A</i> | Body    | shore    | 0.004683273  | 0.266251852 |
| cg12149795    | 21 | 47882121  | q | <i>DIP2A</i> | Body    | shelf    | 0.008729639  | 0.282499671 |
| cg09493818    | 21 | 47917455  | q | <i>DIP2A</i> | Body    | shore    | 0.003105588  | 0.409117523 |
| cg16004390    | 21 | 47918542  | q | <i>DIP2A</i> | Body    | island   | -0.00423865  | 0.231948409 |
| cg10573553    | 21 | 47918580  | q | <i>DIP2A</i> | Body    | island   | -0.000515383 | 0.44475564  |
| cg26155719    | 21 | 47918693  | q | <i>DIP2A</i> | Body    | island   | 0.003976046  | 0.286015506 |
| cg16636721    | 21 | 47920571  | q | <i>DIP2A</i> | Body    | shore    | 0.00957486   | 0.30681487  |
| cg03173479    | 21 | 47965968  | q | <i>DIP2A</i> | Body    | open sea | 0.001465824  | 0.295131842 |
| cg10605724    | 21 | 47966967  | q | <i>DIP2A</i> | Body    | open sea | 0.005161047  | 0.192653554 |
| cg07389144    | 21 | 47969887  | q | <i>DIP2A</i> | Body    | open sea | 0.01071332   | 0.172266714 |
| cg09371744    | 21 | 47987607  | q | <i>DIP2A</i> | 3'UTR   | open sea | -0.011454094 | 0.295600043 |
| cg14479617    | 3  | 119542274 | q | <i>GSK3B</i> | 3'UTR   | open sea | 0.001962751  | 0.452297553 |
| cg15970035    | 3  | 119626443 | q | <i>GSK3B</i> | Body    | open sea | 0.00091831   | 0.461536471 |
| cg12090885    | 3  | 119632116 | q | <i>GSK3B</i> | Body    | open sea | 0.010846822  | 0.070503316 |
| ch.3.2338385R | 3  | 119681371 | q | <i>GSK3B</i> | Body    | open sea | 0.013233193  | 0.07078593  |
| cg02636004    | 3  | 119747339 | q | <i>GSK3B</i> | Body    | open sea | -0.00246576  | 0.312529647 |
| cg13474301    | 3  | 119748151 | q | <i>GSK3B</i> | Body    | open sea | -0.003946219 | 0.400301916 |
| cg12956472    | 3  | 119791225 | q | <i>GSK3B</i> | Body    | open sea | -0.001441162 | 0.459953109 |
| cg13250001    | 3  | 119810597 | q | <i>GSK3B</i> | Body    | shelf    | 0.007447043  | 0.232864296 |
| cg19519393    | 3  | 119811892 | q | <i>GSK3B</i> | Body    | shore    | 0.006780995  | 0.33707332  |
| cg10347998    | 3  | 119812602 | q | <i>GSK3B</i> | 1stExon | shore    | 0.001123757  | 0.238657454 |
| cg25319031    | 3  | 119813310 | q | <i>GSK3B</i> | TSS200  | island   | 0.000971106  | 0.318980655 |
| cg12698784    | 3  | 119813316 | q | <i>GSK3B</i> | TSS200  | island   | -0.000599285 | 0.319745972 |
| cg14472315    | 3  | 119813523 | q | <i>GSK3B</i> | TSS1500 | island   | 0.004060803  | 0.073198924 |
| cg08227698    | 3  | 119813564 | q | <i>GSK3B</i> | TSS1500 | island   | -0.002510282 | 0.284134318 |
| cg14449845    | 3  | 119813927 | q | <i>GSK3B</i> | TSS1500 | island   | -0.004447735 | 0.191906015 |
| cg12733004    | 3  | 119814122 | q | <i>GSK3B</i> | TSS1500 | island   | 0.000305658  | 0.439850565 |
| cg11789444    | 3  | 119814398 | q | <i>GSK3B</i> | TSS1500 | island   | 0.000388358  | 0.441613326 |
| cg05300996    | 3  | 119814693 | q | <i>GSK3B</i> | TSS1500 | shore    | 0.002581774  | 0.216795815 |
| cg11117266    | 17 | 43971461  | q | <i>MAPT</i>  | TSS1500 | island   | 0.000680276  | 0.403060224 |
| cg16520312    | 17 | 43971471  | q | <i>MAPT</i>  | TSS1500 | island   | 0.001926543  | 0.27118258  |
| cg07163735    | 17 | 43971906  | q | <i>MAPT</i>  | 1stExon | island   | 0.000825867  | 0.411577136 |
| cg20099416    | 17 | 43971919  | q | <i>MAPT</i>  | 1stExon | island   | 0.004379638  | 0.036571534 |

|            |    |          |   |             |         |          |              |             |
|------------|----|----------|---|-------------|---------|----------|--------------|-------------|
| cg21327887 | 17 | 43971928 | q | <i>MAPT</i> | 1stExon | island   | 0.002346723  | 0.136737836 |
| cg12989733 | 17 | 43972306 | q | <i>MAPT</i> | 5'UTR   | island   | 0.000586791  | 0.357243645 |
| cg00891649 | 17 | 43972573 | q | <i>MAPT</i> | 5'UTR   | island   | 0.000706321  | 0.465368101 |
| cg19670923 | 17 | 43972806 | q | <i>MAPT</i> | 5'UTR   | island   | 0.003377618  | 0.05884016  |
| cg02804087 | 17 | 43972969 | q | <i>MAPT</i> | 5'UTR   | island   | 0.002369872  | 0.061687447 |
| cg18368019 | 17 | 43972978 | q | <i>MAPT</i> | 5'UTR   | island   | 0.002251602  | 0.065977721 |
| cg10725121 | 17 | 43973146 | q | <i>MAPT</i> | 5'UTR   | island   | -0.002219882 | 0.163988615 |
| cg13137533 | 17 | 43973292 | q | <i>MAPT</i> | 5'UTR   | island   | -0.002530707 | 0.261099103 |
| cg09478742 | 17 | 43973311 | q | <i>MAPT</i> | 5'UTR   | island   | -0.002703457 | 0.255003308 |
| cg11489262 | 17 | 43973426 | q | <i>MAPT</i> | 5'UTR   | island   | 0.016099632  | 0.0206586   |
| cg10780632 | 17 | 43973522 | q | <i>MAPT</i> | 5'UTR   | island   | -0.005081071 | 0.179479501 |
| cg19156875 | 17 | 43974446 | q | <i>MAPT</i> | 5'UTR   | island   | 0.007777036  | 0.19369867  |
| cg26606256 | 17 | 43974804 | q | <i>MAPT</i> | 5'UTR   | island   | 3.33E-05     | 0.497967578 |
| cg14202850 | 17 | 43974869 | q | <i>MAPT</i> | 5'UTR   | island   | 0.008472044  | 0.229298085 |
| cg11909912 | 17 | 43974919 | q | <i>MAPT</i> | 5'UTR   | island   | -0.000414697 | 0.472359905 |
| cg04382470 | 17 | 43974975 | q | <i>MAPT</i> | 5'UTR   | island   | 0.004588558  | 0.249117462 |
| cg10224600 | 17 | 43975063 | q | <i>MAPT</i> | 5'UTR   | shore    | 0.000695913  | 0.468109682 |
| cg27457921 | 17 | 43976811 | q | <i>MAPT</i> | 5'UTR   | shore    | 0.018811566  | 0.019737516 |
| cg19108736 | 17 | 43977403 | q | <i>MAPT</i> | 5'UTR   | shelf    | 0.00267914   | 0.427097119 |
| cg20888521 | 17 | 43977917 | q | <i>MAPT</i> | 5'UTR   | shelf    | 0.012128968  | 0.161082822 |
| cg22291189 | 17 | 43978251 | q | <i>MAPT</i> | 5'UTR   | shelf    | 0.008087593  | 0.121342401 |
| cg26019600 | 17 | 43978704 | q | <i>MAPT</i> | 5'UTR   | shelf    | 0.008779302  | 0.294771647 |
| cg12633764 | 17 | 43978756 | q | <i>MAPT</i> | 5'UTR   | shelf    | 0.003488564  | 0.297590242 |
| cg26413900 | 17 | 43985654 | q | <i>MAPT</i> | 5'UTR   | open sea | -0.003683986 | 0.430889311 |
| cg16573346 | 17 | 44020278 | q | <i>MAPT</i> | 5'UTR   | open sea | 0.00482126   | 0.260972649 |
| cg15323584 | 17 | 44022846 | q | <i>MAPT</i> | 5'UTR   | shelf    | 0.004967362  | 0.250550155 |
| cg00699617 | 17 | 44026428 | q | <i>MAPT</i> | 5'UTR   | shore    | 0.01265718   | 0.193901445 |
| cg26163368 | 17 | 44026652 | q | <i>MAPT</i> | 5'UTR   | island   | 0.006604262  | 0.254676152 |
| cg17569492 | 17 | 44026659 | q | <i>MAPT</i> | 5'UTR   | island   | 0.024856213  | 0.031323104 |
| cg05772917 | 17 | 44027251 | q | <i>MAPT</i> | 5'UTR   | shore    | 0.004024611  | 0.419754673 |
| cg01640727 | 17 | 44029468 | q | <i>MAPT</i> | 5'UTR   | shelf    | 0.015190567  | 0.123658873 |
| cg03836283 | 17 | 44058856 | q | <i>MAPT</i> | Body    | shore    | 0.00140378   | 0.425020086 |
| cg00846647 | 17 | 44060252 | q | <i>MAPT</i> | Body    | island   | -0.00153479  | 0.420142743 |
| cg19276540 | 17 | 44060353 | q | <i>MAPT</i> | Body    | island   | -0.000178597 | 0.47081144  |
| cg20265358 | 17 | 44060424 | q | <i>MAPT</i> | Body    | island   | 0.006425394  | 0.125183385 |
| cg00438222 | 17 | 44060502 | q | <i>MAPT</i> | Body    | island   | 0.000801136  | 0.391785485 |
| cg22128613 | 17 | 44061117 | q | <i>MAPT</i> | Body    | shore    | 0.002759966  | 0.24679588  |

|            |    |           |   |              |         |          |              |             |
|------------|----|-----------|---|--------------|---------|----------|--------------|-------------|
| cg21953146 | 17 | 44061258  | q | <i>MAPT</i>  | Body    | shore    | 0.006275857  | 0.286376301 |
| cg26979107 | 17 | 44061355  | q | <i>MAPT</i>  | Body    | shore    | -0.002282469 | 0.299146658 |
| cg19495068 | 17 | 44061467  | q | <i>MAPT</i>  | Body    | shore    | 0.00220096   | 0.407751937 |
| cg01934064 | 17 | 44064242  | q | <i>MAPT</i>  | Body    | shelf    | 0.00131111   | 0.390547073 |
| cg16656794 | 17 | 44068842  | q | <i>MAPT</i>  | Body    | open sea | 6.26E-05     | 0.493963111 |
| cg00480298 | 17 | 44068857  | q | <i>MAPT</i>  | Body    | open sea | 0.011949771  | 0.178017152 |
| cg05721485 | 17 | 44071124  | q | <i>MAPT</i>  | Body    | open sea | 0.017532332  | 0.091236818 |
| cg12604352 | 17 | 44073915  | q | <i>MAPT</i>  | Body    | open sea | 0.008844467  | 0.262624401 |
| cg12727978 | 17 | 44075500  | q | <i>MAPT</i>  | Body    | open sea | -0.000740711 | 0.433160045 |
| cg24677220 | 17 | 44075684  | q | <i>MAPT</i>  | Body    | open sea | 0.008350911  | 0.035849638 |
| cg14431592 | 17 | 44076415  | q | <i>STH</i>   | TSS200  | open sea | -0.008062941 | 0.209919014 |
| cg15682851 | 17 | 44076429  | q | <i>STH</i>   | TSS200  | open sea | -0.005728146 | 0.281493931 |
| cg01098886 | 17 | 44076726  | q | <i>MAPT</i>  | Body    | open sea | -0.006579559 | 0.354964312 |
| cg13400969 | 17 | 44087762  | q | <i>MAPT</i>  | Body    | open sea | -0.012028073 | 0.174431475 |
| cg20840174 | 17 | 44087784  | q | <i>MAPT</i>  | Body    | open sea | 0.004136896  | 0.374278902 |
| cg07368061 | 17 | 44090862  | q | <i>MAPT</i>  | Body    | open sea | 0.005234941  | 0.402268029 |
| cg15690475 | 17 | 44101453  | q | <i>MAPT</i>  | Body    | open sea | -0.014338538 | 0.098674978 |
| cg24612059 | 17 | 44101462  | q | <i>MAPT</i>  | Body    | open sea | -0.012210508 | 0.124489134 |
| cg05533539 | 17 | 44104521  | q | <i>MAPT</i>  | 3'UTR   | open sea | 0.012789297  | 0.171627353 |
| cg09764761 | 17 | 44105544  | q | <i>MAPT</i>  | 3'UTR   | open sea | 0.000220186  | 0.493343883 |
| cg05872255 | 14 | 73592157  | q | <i>PSEN1</i> | IGR     | open sea | 0.010554702  | 0.130716029 |
| cg09970967 | 14 | 73602752  | q | <i>PSEN1</i> | TSS1500 | shore    | -0.000894964 | 0.466118889 |
| cg26124115 | 14 | 73602899  | q | <i>PSEN1</i> | TSS1500 | island   | -0.002844604 | 0.136415812 |
| cg11490446 | 14 | 73602923  | q | <i>PSEN1</i> | TSS1500 | island   | -0.000580511 | 0.427771662 |
| cg13173405 | 14 | 73602951  | q | <i>PSEN1</i> | TSS200  | island   | 0.001289393  | 0.403256357 |
| cg11143091 | 14 | 73603203  | q | <i>PSEN1</i> | 1stExon | island   | 0.001548308  | 0.255744529 |
| cg26376566 | 14 | 73603660  | q | <i>PSEN1</i> | 5'UTR   | island   | 0.007960539  | 0.327587189 |
| cg12162778 | 14 | 73603844  | q | <i>PSEN1</i> | 5'UTR   | shore    | 0.004372837  | 0.324760238 |
| cg23501468 | 14 | 73606606  | q | <i>PSEN1</i> | 5'UTR   | shelf    | -0.004686003 | 0.366180909 |
| cg10734940 | 14 | 73668083  | q | <i>PSEN1</i> | Body    | open sea | 0.004467083  | 0.158606112 |
| cg10426062 | 14 | 73677854  | q | <i>PSEN1</i> | Body    | open sea | 0.010648083  | 0.200379239 |
| cg05385100 | 14 | 73689196  | q | <i>PSEN1</i> | 3'UTR   | open sea | 0.003326107  | 0.372193275 |
| cg06540458 | 1  | 226951747 | q | <i>PSEN2</i> | IGR     | open sea | 0.019687566  | 0.12925639  |
| cg21879716 | 1  | 226967207 | q | <i>PSEN2</i> | IGR     | open sea | -0.001101802 | 0.42171192  |
| cg03547355 | 1  | 227003060 | q | <i>PSEN2</i> | IGR     | open sea | 0.002303232  | 0.466329302 |
| cg14422093 | 1  | 227009245 | q | <i>PSEN2</i> | IGR     | open sea | 0.006926346  | 0.222288302 |
| cg08654091 | 1  | 227015418 | q | <i>PSEN2</i> | IGR     | open sea | 0.019154506  | 0.133540391 |

|            |    |           |   |               |         |          |              |             |
|------------|----|-----------|---|---------------|---------|----------|--------------|-------------|
| cg16985288 | 1  | 227015456 | q | <i>PSEN2</i>  | IGR     | open sea | 0.007788674  | 0.337451454 |
| cg20484086 | 1  | 227015727 | q | <i>PSEN2</i>  | IGR     | open sea | 0.014330611  | 0.172290849 |
| cg13870041 | 1  | 227015885 | q | <i>PSEN2</i>  | IGR     | open sea | 0.008781004  | 0.041373382 |
| cg23950691 | 1  | 227015916 | q | <i>PSEN2</i>  | IGR     | open sea | 0.003821691  | 0.190790221 |
| cg13935266 | 1  | 227015922 | q | <i>PSEN2</i>  | IGR     | open sea | 0.001995265  | 0.340851626 |
| cg13223182 | 1  | 227015944 | q | <i>PSEN2</i>  | IGR     | open sea | -0.001012799 | 0.375719125 |
| cg22223430 | 1  | 227015971 | q | <i>PSEN2</i>  | IGR     | open sea | 0.008658978  | 0.04366096  |
| cg01784507 | 1  | 227016024 | q | <i>PSEN2</i>  | IGR     | open sea | 0.036204731  | 0.030061738 |
| cg12761965 | 1  | 227051345 | q | <i>PSEN2</i>  | IGR     | open sea | 0.007216079  | 0.210366461 |
| cg18395233 | 1  | 227054129 | q | <i>PSEN2</i>  | IGR     | shelf    | 0.007943971  | 0.084169296 |
| cg10879712 | 1  | 227056896 | q | <i>PSEN2</i>  | TSS1500 | shore    | 0.001170394  | 0.409926335 |
| cg00479101 | 1  | 227058070 | q | <i>PSEN2</i>  | TSS1500 | island   | -0.00304471  | 0.170207454 |
| cg03307360 | 1  | 227058426 | q | <i>PSEN2</i>  | 5'UTR   | island   | 0.004020812  | 0.076070407 |
| cg21417192 | 1  | 227058595 | q | <i>PSEN2</i>  | 5'UTR   | island   | 0.000532828  | 0.394111636 |
| cg03338380 | 1  | 227058754 | q | <i>PSEN2</i>  | 5'UTR   | island   | -0.001015001 | 0.224050263 |
| cg26656022 | 1  | 227058905 | q | <i>PSEN2</i>  | 5'UTR   | island   | -0.002295916 | 0.221911991 |
| cg05134019 | 1  | 227059463 | q | <i>PSEN2</i>  | 5'UTR   | shore    | -0.002154485 | 0.253213633 |
| cg23220071 | 1  | 227061009 | q | <i>PSEN2</i>  | 5'UTR   | shelf    | 0.007552277  | 0.360336149 |
| cg08708961 | 1  | 227070630 | q | <i>PSEN2</i>  | Body    | open sea | 0.000680894  | 0.467932806 |
| cg18027831 | 1  | 227083489 | q | <i>PSEN2</i>  | 3'UTR   | open sea | -0.007585419 | 0.248974151 |
| cg09769084 | 1  | 227091160 | q | <i>PSEN2</i>  | IGR     | open sea | 0.00184865   | 0.342560167 |
| cg01359015 | 17 | 74467334  | q | <i>RHBDF2</i> | 3'UTR   | shore    | 0.000639268  | 0.435843412 |
| cg08104579 | 17 | 74467662  | q | <i>RHBDF2</i> | 3'UTR   | shore    | 0.00358963   | 0.221896359 |
| cg18493449 | 17 | 74467972  | q | <i>RHBDF2</i> | Body    | island   | -0.001915956 | 0.379187917 |
| cg21280422 | 17 | 74468141  | q | <i>RHBDF2</i> | Body    | island   | 0.001783257  | 0.325822674 |
| cg16607945 | 17 | 74468491  | q | <i>RHBDF2</i> | Body    | shore    | -0.000215832 | 0.473529522 |
| cg04577809 | 17 | 74469369  | q | <i>RHBDF2</i> | Body    | shore    | 0.001582421  | 0.264980752 |
| cg27605355 | 17 | 74472963  | q | <i>RHBDF2</i> | Body    | shelf    | 0.001670963  | 0.279925389 |
| cg17289057 | 17 | 74473006  | q | <i>RHBDF2</i> | Body    | shelf    | 0.002083195  | 0.093534665 |
| cg06097533 | 17 | 74473066  | q | <i>RHBDF2</i> | Body    | shelf    | -0.003130113 | 0.143211891 |
| cg08008636 | 17 | 74475050  | q | <i>RHBDF2</i> | Body    | shore    | 0.001662275  | 0.299243964 |
| cg05810363 | 17 | 74475270  | q | <i>RHBDF2</i> | Body    | island   | 0.001086669  | 0.262102608 |
| cg13076843 | 17 | 74475294  | q | <i>RHBDF2</i> | Body    | island   | 0.003099262  | 0.168950432 |
| cg12309456 | 17 | 74475402  | q | <i>RHBDF2</i> | Body    | island   | 0.001472824  | 0.267312914 |
| cg20690125 | 17 | 74476978  | q | <i>RHBDF2</i> | Body    | shore    | 0.023679497  | 0.101706327 |
| cg21486834 | 17 | 74477542  | q | <i>RHBDF2</i> | Body    | shelf    | 0.006366226  | 0.116671896 |
| cg09123026 | 17 | 74480528  | q | <i>RHBDF2</i> | 5'UTR   | open sea | -0.001567315 | 0.280961119 |

|            |    |          |   |                 |         |          |              |             |
|------------|----|----------|---|-----------------|---------|----------|--------------|-------------|
| cg26737223 | 17 | 74488855 | q | <i>RHBDF2</i>   | 5'UTR   | open sea | 0.005580949  | 0.192429814 |
| cg12900649 | 17 | 74494213 | q | <i>RHBDF2</i>   | 5'UTR   | shelf    | 0.021498136  | 0.093759764 |
| cg24757533 | 17 | 74494286 | q | <i>RHBDF2</i>   | 5'UTR   | shelf    | 0.02518894   | 0.057606087 |
| cg25826360 | 17 | 74496953 | q | <i>RHBDF2</i>   | 5'UTR   | shore    | -0.013416461 | 0.18141556  |
| cg08672410 | 17 | 74497109 | q | <i>RHBDF2</i>   | 5'UTR   | island   | 0.009723393  | 0.186741337 |
| cg25038060 | 17 | 74497306 | q | <i>RHBDF2</i>   | 5'UTR   | island   | -0.002594961 | 0.180201437 |
| cg12565681 | 17 | 74497418 | q | <i>RHBDF2</i>   | 5'UTR   | island   | -0.001266218 | 0.287469639 |
| cg21028211 | 17 | 74497614 | q | <i>RHBDF2</i>   | TSS200  | island   | -0.001369047 | 0.396321956 |
| cg11539992 | 17 | 74497631 | q | <i>RHBDF2</i>   | TSS200  | island   | -0.000661802 | 0.417863122 |
| cg09458299 | 17 | 74497653 | q | <i>RHBDF2</i>   | TSS200  | shore    | 0.017965883  | 0.038117901 |
| cg00634714 | 17 | 74497851 | q | <i>RHBDF2</i>   | TSS1500 | shore    | 0.029681675  | 0.008024954 |
| cg20690922 | 17 | 74498083 | q | <i>RHBDF2</i>   | TSS1500 | shore    | 0.001473825  | 0.35510093  |
| cg01217876 | 17 | 74498163 | q | <i>RHBDF2</i>   | TSS1500 | shore    | 0.003815653  | 0.2513997   |
| cg23877786 | 16 | 89626662 | q | <i>RPL13</i>    | TSS1500 | island   | 0.000196517  | 0.438514396 |
| cg05547654 | 16 | 89626678 | q | <i>RPL13</i>    | TSS1500 | island   | 0.001554316  | 0.156085848 |
| cg26585801 | 16 | 89626715 | q | <i>RPL13</i>    | TSS1500 | island   | -9.47E-05    | 0.483631873 |
| cg02897623 | 16 | 89626761 | q | <i>RPL13</i>    | TSS1500 | island   | 0.00595191   | 0.020355857 |
| cg03757109 | 16 | 89627028 | q | <i>RPL13</i>    | TSS200  | island   | 0.001085758  | 0.292887877 |
| cg14220544 | 16 | 89627035 | q | <i>RPL13</i>    | TSS200  | island   | -0.002826867 | 0.302474777 |
| cg08723769 | 16 | 89627049 | q | <i>RPL13</i>    | TSS200  | island   | -0.001030906 | 0.323450738 |
| cg09554007 | 16 | 89627174 | q | <i>RPL13</i>    | 5'UTR   | island   | 0.004051881  | 0.062389617 |
| cg07868478 | 16 | 89627303 | q | <i>RPL13</i>    | 5'UTR   | island   | -0.000265421 | 0.436280942 |
| cg04803098 | 16 | 89627791 | q | <i>RPL13</i>    | Body    | island   | 0.001254059  | 0.285506617 |
| cg09411121 | 16 | 89627813 | q | <i>RPL13</i>    | Body    | island   | 0.005698609  | 0.038714181 |
| cg01035068 | 16 | 89627855 | q | <i>RPL13</i>    | Body    | island   | 0.002093929  | 0.171835297 |
| cg01995548 | 16 | 89628799 | q | <i>RPL13</i>    | Body    | shore    | 0.002982648  | 0.414687092 |
| cg02732508 | 16 | 89628853 | q | <i>RPL13</i>    | Body    | shore    | -0.008748374 | 0.292219278 |
| cg07344397 | 16 | 89629499 | q | <i>RPL13</i>    | 3'UTR   | shore    | 0.013092918  | 0.164126483 |
| cg08838752 | 17 | 1659924  | p | <i>SERPINF1</i> | IGR     | shelf    | 0.00219743   | 0.255033794 |
| cg08547211 | 17 | 1664077  | p | <i>SERPINF1</i> | TSS1500 | open sea | 0.004631378  | 0.251327877 |
| cg22234345 | 17 | 1664329  | p | <i>SERPINF1</i> | TSS1500 | open sea | -0.003044954 | 0.310206448 |
| cg00844277 | 17 | 1664339  | p | <i>SERPINF1</i> | TSS1500 | open sea | -0.011972835 | 0.04160007  |
| cg24214470 | 17 | 1665119  | p | <i>SERPINF1</i> | TSS200  | open sea | -0.004309583 | 0.424251801 |
| cg22513955 | 17 | 1665123  | p | <i>SERPINF1</i> | TSS200  | open sea | -0.008684244 | 0.338616416 |
| cg27102649 | 17 | 1665172  | p | <i>SERPINF1</i> | TSS200  | open sea | -0.006415735 | 0.327418463 |
| cg11692409 | 17 | 1665181  | p | <i>SERPINF1</i> | TSS200  | open sea | -0.011446183 | 0.29323126  |
| cg22242539 | 17 | 1665220  | p | <i>SERPINF1</i> | TSS200  | open sea | 0.001406409  | 0.471106742 |

Mano *et al.*

AD neuronal methylome reveals BRCA1 aggregation

Supporting Information Appendix

|            |    |         |   |                 |         |          |              |             |
|------------|----|---------|---|-----------------|---------|----------|--------------|-------------|
| cg25158320 | 17 | 1665262 | p | <i>SERPINF1</i> | 1stExon | open sea | -0.005748118 | 0.378052098 |
| cg06940127 | 17 | 1665303 | p | <i>SERPINF1</i> | 1stExon | open sea | 0.004470772  | 0.381107243 |
| cg00777079 | 17 | 1666607 | p | <i>SERPINF1</i> | 5'UTR   | open sea | 0.000317959  | 0.494182452 |
| cg07438421 | 17 | 1675235 | p | <i>SERPINF1</i> | Body    | open sea | 0.008007864  | 0.136369766 |
| cg17141696 | 17 | 1680805 | p | <i>SERPINF1</i> | 3'UTR   | open sea | -0.005373523 | 0.349224791 |
| cg07804577 | 17 | 1645462 | p | <i>SERPINF2</i> | TSS1500 | open sea | -0.001928056 | 0.306426633 |
| cg07433905 | 17 | 1645859 | p | <i>SERPINF2</i> | TSS1500 | open sea | -0.001807963 | 0.44481848  |
| cg06387669 | 17 | 1646196 | p | <i>SERPINF2</i> | 1stExon | open sea | -0.023320151 | 0.159247426 |
| cg04780454 | 17 | 1647819 | p | <i>SERPINF2</i> | 5'UTR   | open sea | 0.027788267  | 0.02359298  |
| cg25803583 | 17 | 1648622 | p | <i>SERPINF2</i> | Body    | open sea | 0.000637018  | 0.382218983 |
| cg14208859 | 17 | 1653873 | p | <i>SERPINF2</i> | Body    | shelf    | 0.002903475  | 0.132594647 |
| cg10516117 | 17 | 1656147 | p | <i>SERPINF2</i> | Body    | shore    | 0.004313767  | 0.334613397 |
| cg13027184 | 17 | 1657448 | p | <i>SERPINF2</i> | Body    | island   | 0.005624985  | 0.209656001 |
| cg23226397 | 17 | 1657480 | p | <i>SERPINF2</i> | Body    | island   | 0.001173381  | 0.390514208 |
| cg17514665 | 17 | 1657533 | p | <i>SERPINF2</i> | Body    | island   | 0.001182215  | 0.317764251 |
| cg18278729 | 17 | 1657676 | p | <i>SERPINF2</i> | Body    | island   | 0.018457067  | 0.038733449 |
| cg20162822 | 17 | 1658265 | p | <i>SERPINF2</i> | 3'UTR   | shore    | 0.005494672  | 0.350173228 |
| cg21458932 | 17 | 1658296 | p | <i>SERPINF2</i> | 3'UTR   | shore    | 0.015088016  | 0.183139727 |



Figure S1

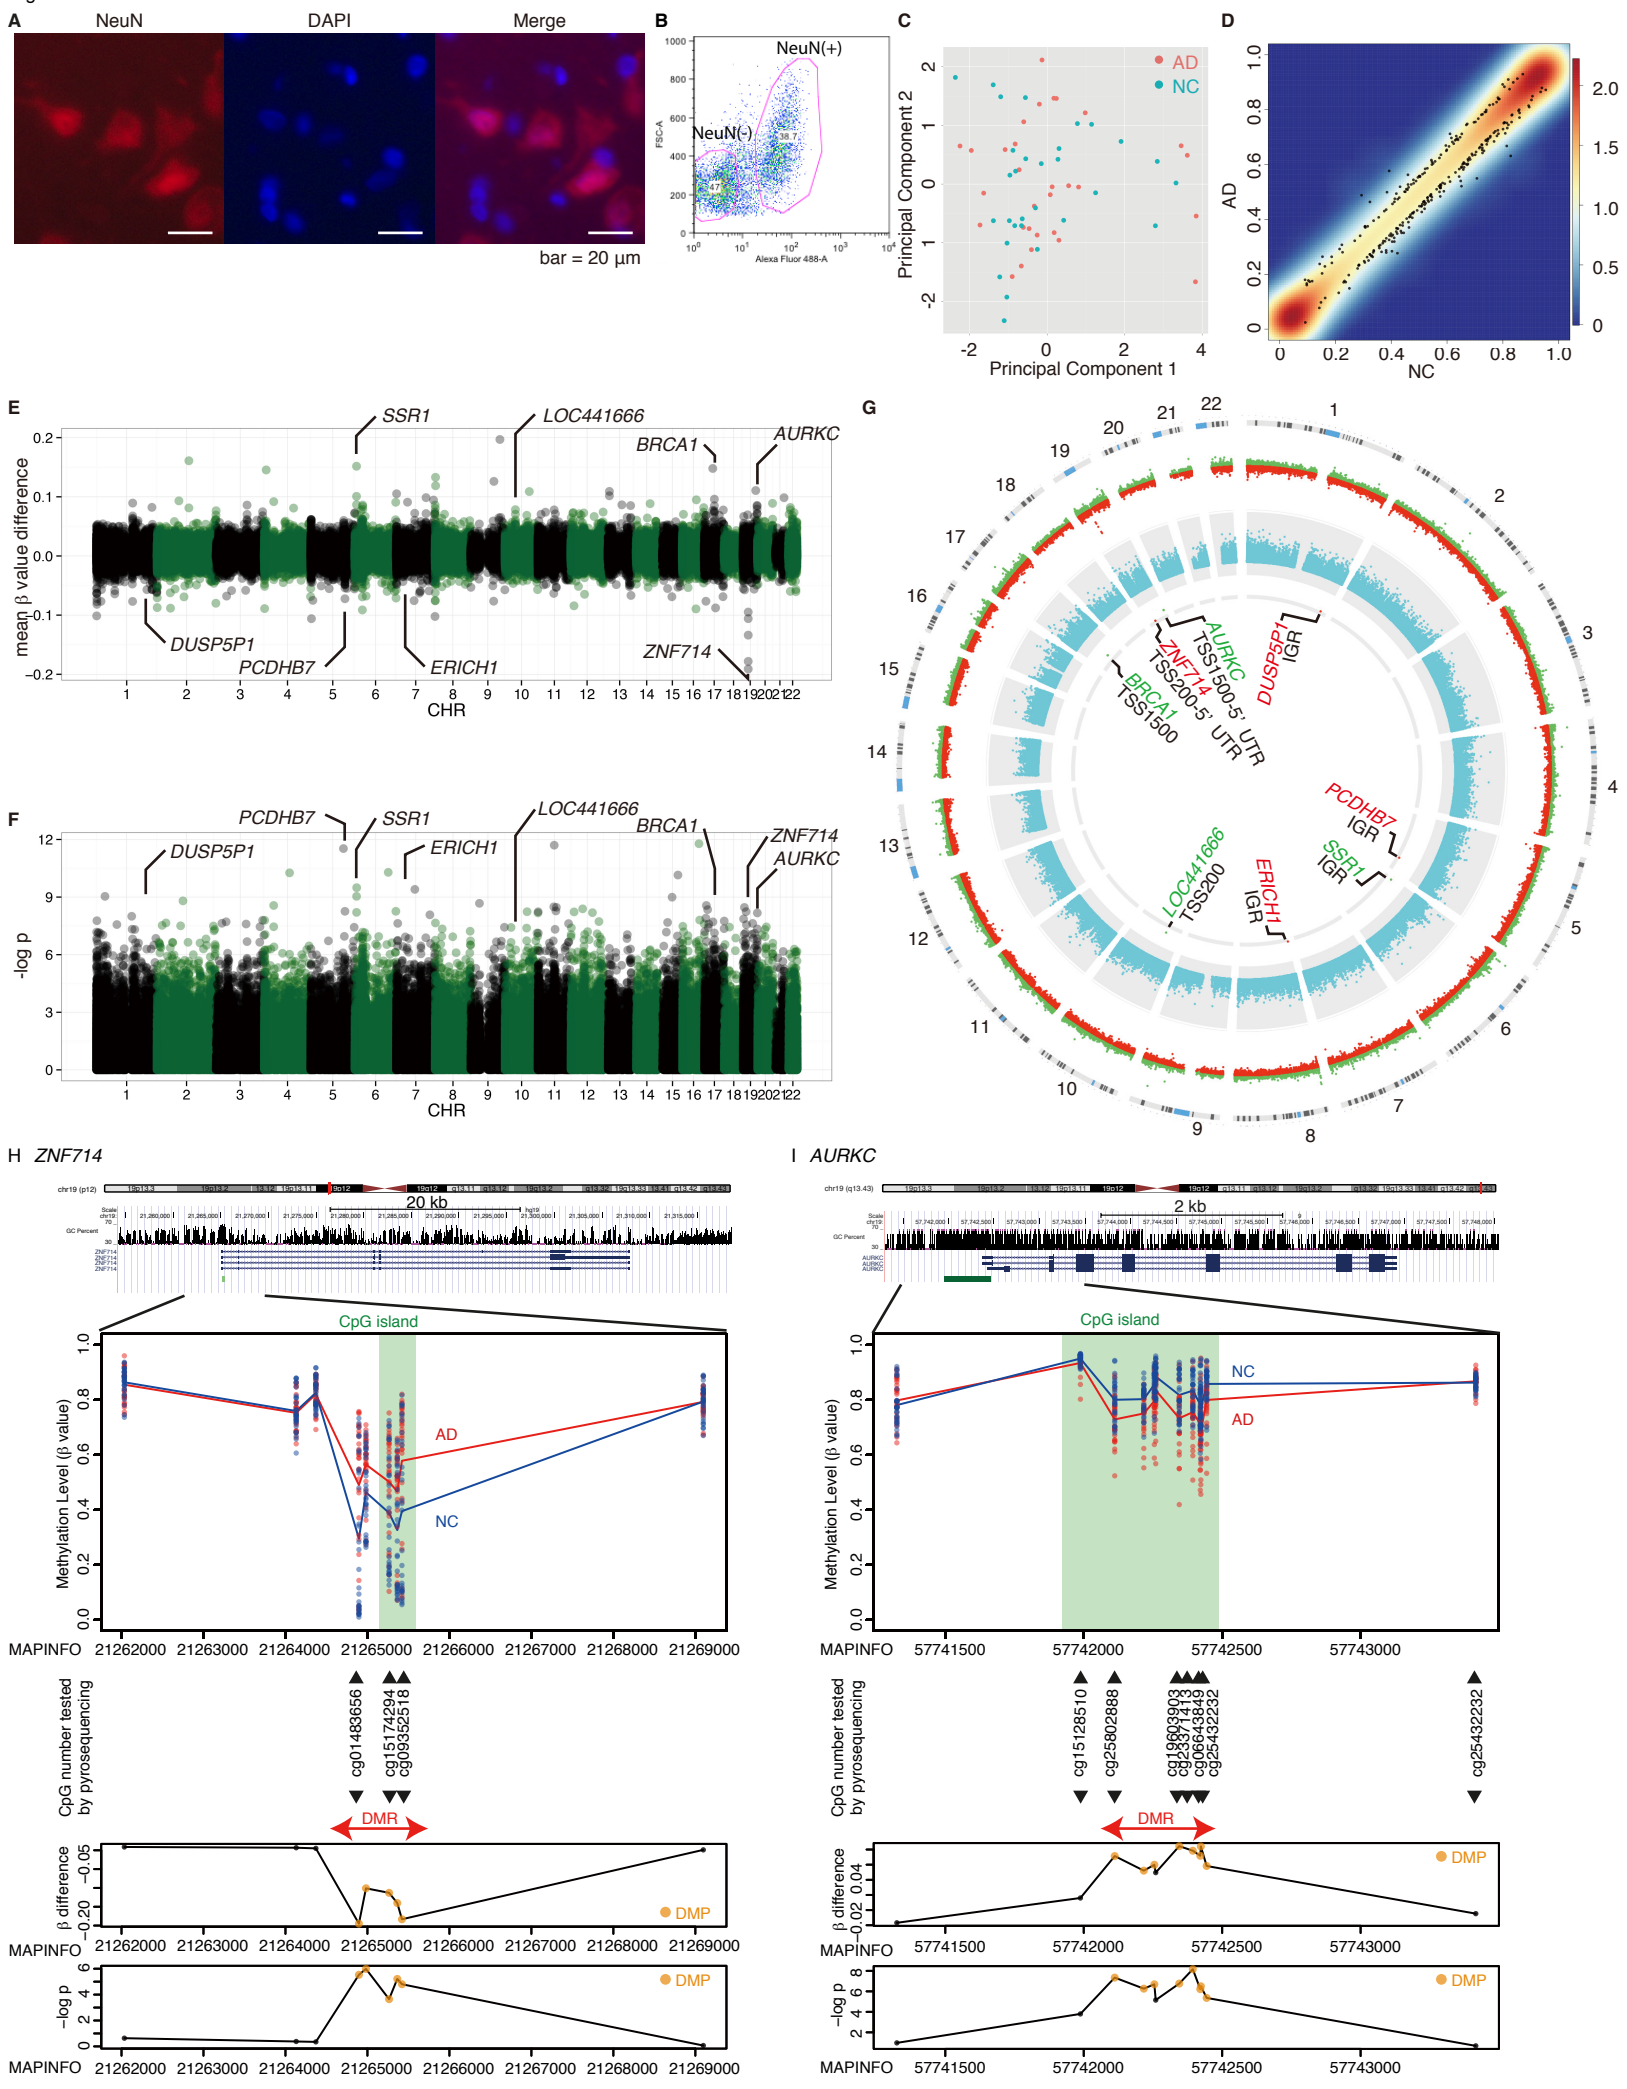

**Figure S1**

Neuron-specific methylome screening reveals differentially methylated genes in AD brains. (A)

NeuN, DAPI staining, and their merged images of the representative starting material for FACS

separation. (B) Representative flow cytogram with NeuN antibody. (C) Principal component

analysis of 30 AD (red) and 30 NC (blue) based on methylation levels of MVP (most variable

probe) 1000. Neuronal DNA was extracted from the temporal lobe of the brain samples. The first

and second principal components are plotted. (D) Distribution of mean  $\beta$ -values of 30 AD and 30

NC depicted as a density plot. Black dots represent differentially methylated probes (one-sided

Student's *t*-test  $P < 0.05$ , mean  $\beta$  difference  $> 0.05$ ). Density of each point was depicted with color

scale ranging from blue to red. (E, F) Manhattan plots of the  $\beta$ -value differences (E) and the

statistical significance using a  $-\log(P)$  scale (F). Gene names related to DMRs are shown. (G)

Circos plot of the genome wide DNA methylation landscape of inferior temporal gyrus neuronal

DNA from 30 AD and 30 NC samples. The outermost ring represents chromosome ideograms,

annotated with chromosome numbers, with the p-ter to q-ter orientation in a clockwise direction.

Blue bars represent centromeres within each chromosome. Hypermethylated CpGs in AD samples

Mano *et al.*  
AD neuronal methylome reveals BRCA1 aggregation  
Supporting Information Appendix

are shown with red dots, whereas hypomethylated CpGs are green, with the height of the dots representing the mean  $\beta$ -value difference. The blue dots correspond to the significance level of the  $\beta$ -value difference using a  $-\log(P)$  scale. The innermost circle shows differentially methylated regions (DMRs) annotated with RefSeq gene symbols; genes related to hypermethylated DMRs are shown in red, and hypomethylated DMRs in green. DMR positions are shown in black. IGR, intergenic region; TSS, transcription start site; UTR, untranslated region. (H, I) Details of differentially methylated regions associated with *ZNF714* (H) and *AURKC* (I). The uppermost panel shows genomic structures from the UCSC genome browser including chromosomal ideogram, GC content (vertical bars), RefSeq gene map (blue lines and bars), and CpG islands (green bars). The second panel depicts  $\beta$ -values of each sample at each CpG site. Dots are  $\beta$ -values from each sample and solid lines are mean  $\beta$ -values of each group. Light green areas correspond to CpG islands. CG identifiers listed are the sites where methylation levels were validated using an additional pyrosequencing assay. The last two panels show  $\beta$ -value differences (upper,  $\beta_{NC} - \beta_{AD}$ ) and significance levels on a  $-\log(P)$  scale at each CpG site. Orange dots represent differentially methylated probes (DMPs) discovered by Infinium screening.

Figure S2

A *BRCA1*

B *ZNF714*

C *AURKC*

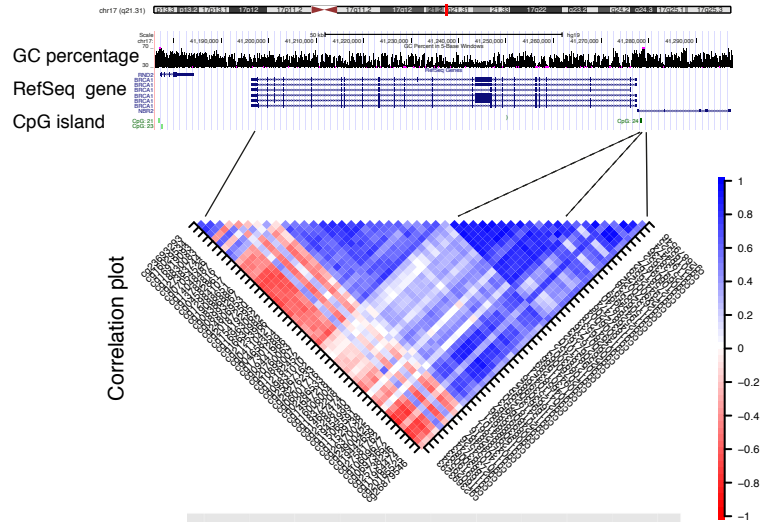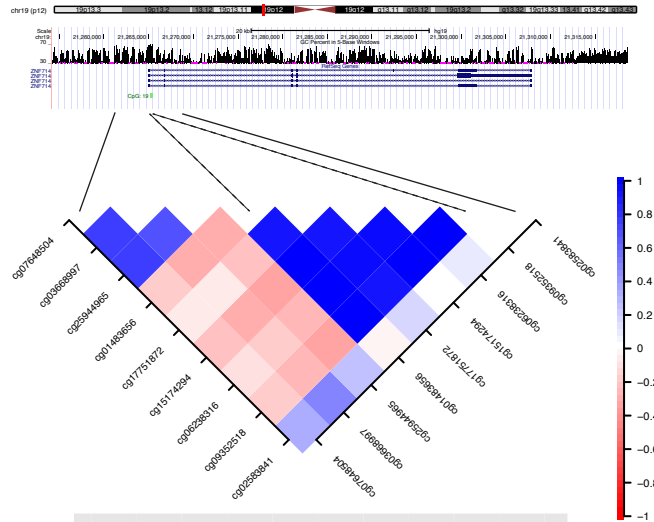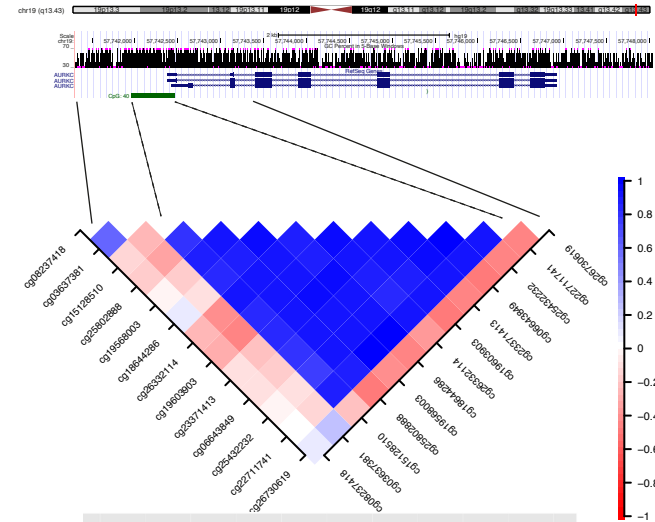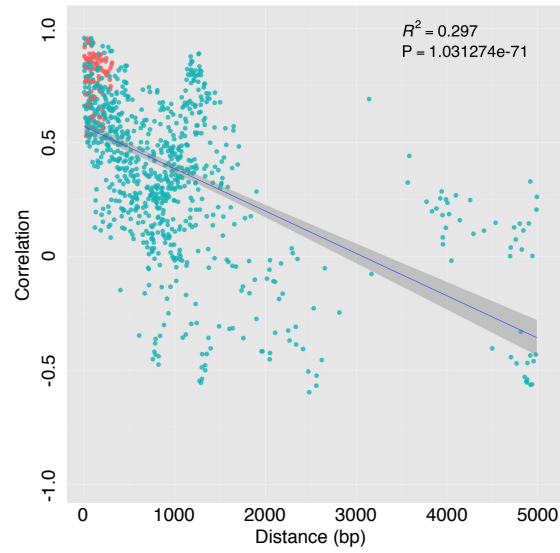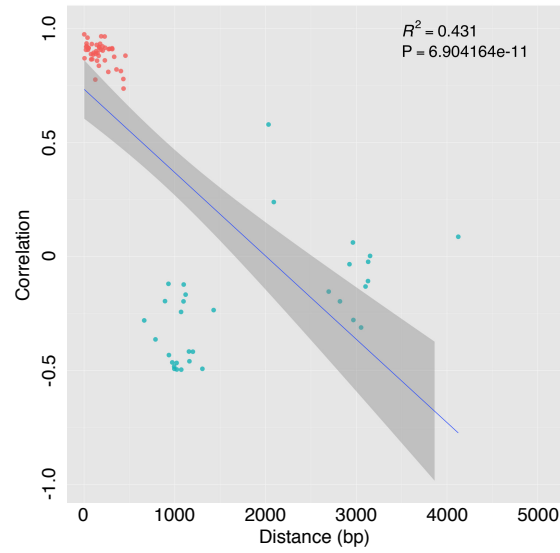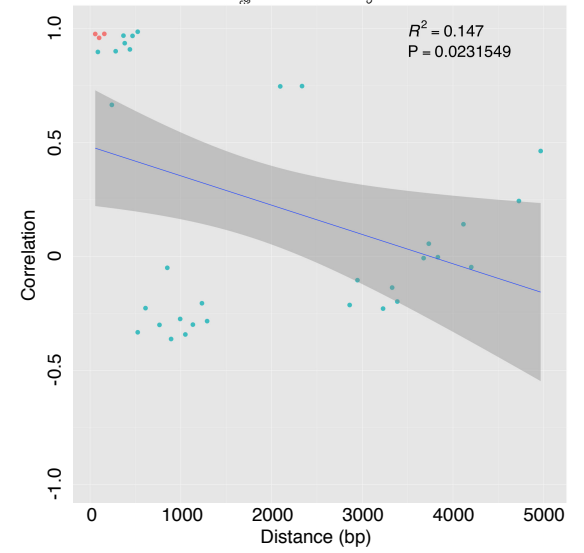

**Figure S2**

Methylation level of CpGs found in *BRCA1* (A), *ZNF714* (B), and *AURKC* (C) show correlation.

Pearson correlation among neighboring CpGs were calculated using the same data sets in figure S1.

The uppermost panel shows genomic structure from UCSC genome browser including chromosomal ideogram, GC percentage (vertical bars), RefSeq gene map (blue lines and bars), and CpG islands (green bars). The second panel depicts Pearson correlation between neighboring CpGs.

Each block represents pairwise Pearson correlation between CpGs, annotated by CpG identifiers.

Lines connected with the gene structure depicted above, at the location of the corresponding CpGs.

Broken lines indicate CpG islands. The third panel shows the relationship between correlation and distance between neighboring CpGs related to each gene. Green color indicates that both CpGs calculated are within the same CpG island. Correlation is depicted with color scale ranging from -1

(blue) to 1 (red).  $R^2$  and P values are shown in the panels.

Figure S3

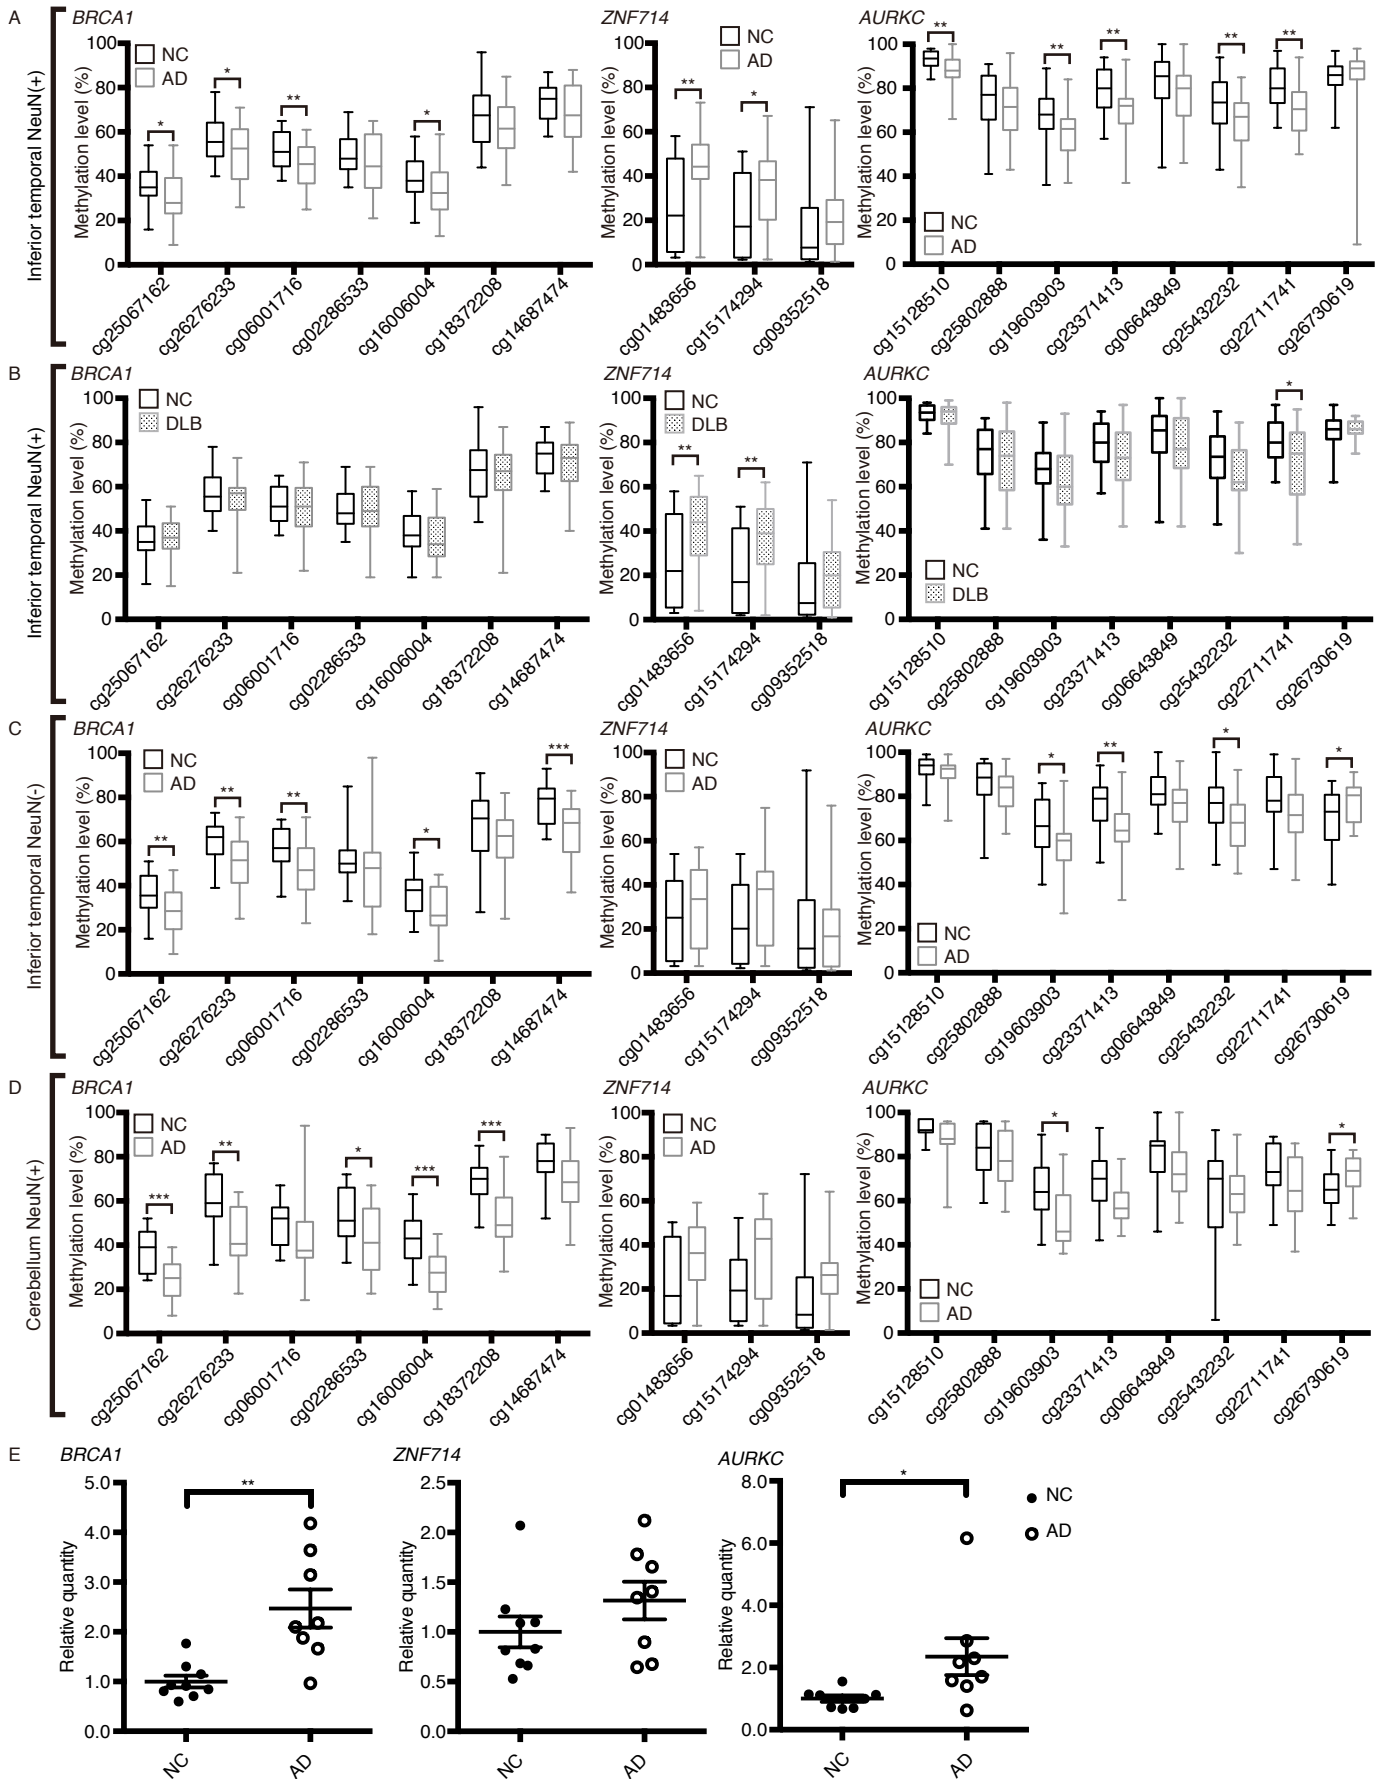

**Figure S3**

Pyrosequencing confirmation of *BRCA1*, *ZNF714*, and *AURKC* CpG methylation level from various samples and their expression analysis from bulk brain mRNA.

(A) Pyrosequencing validation of differentially methylated probes detected in methylation array

analysis. Significance was tested by *t*-test. Black open bar = NC (n = 28), gray open bar = AD (n =

30). (B) Pyrosequencing of dementia with Lewy body (DLB) inferior temporal gyrus samples.

Black open bar = NC (n = 28), gray solid bar=DLB (n = 21). (C) Pyrosequencing results of non-

neuronal DNA from inferior temporal gyrus. Black open bar=NC (n = 24), gray open bar = AD (n =

4). (D) Pyrosequencing results of neuronal DNA from cerebellum samples. Black open bar = NC (n

= 15), gray open bar = AD (n = 14). (E) Quantitative PCR of DMR-associated genes; *BRCA1*,

*ZNF714*, and *AURKC*. Messenger RNA was extracted from the temporal lobe of each brain

samples. Expression levels relative to *GAPDH* are normalized to NC = 1.0. Each sample was

analyzed in quadruplicate, and samples with more than two outliers were filtered out. Each dot

represents the mean value of an individual sample. Error bars represent mean  $\pm$  SEM. n = 8. Solid

circle=NC, open circle=AD. Mean  $\pm$  SEM; *BRCA1*: 1.00  $\pm$  0.12 in NC vs. 2.47  $\pm$  0.38 in AD,

Mano *et al.*  
AD neuronal methylome reveals BRCA1 aggregation  
Supporting Information Appendix

*ZNF714*:  $1.00 \pm 0.15$  in NC vs.  $1.32 \pm 0.19$  in AD, *AURKC*:  $1.00 \pm 0.10$  in NC vs.  $2.69 \pm 0.69$  in

AD.



Figure S4

A

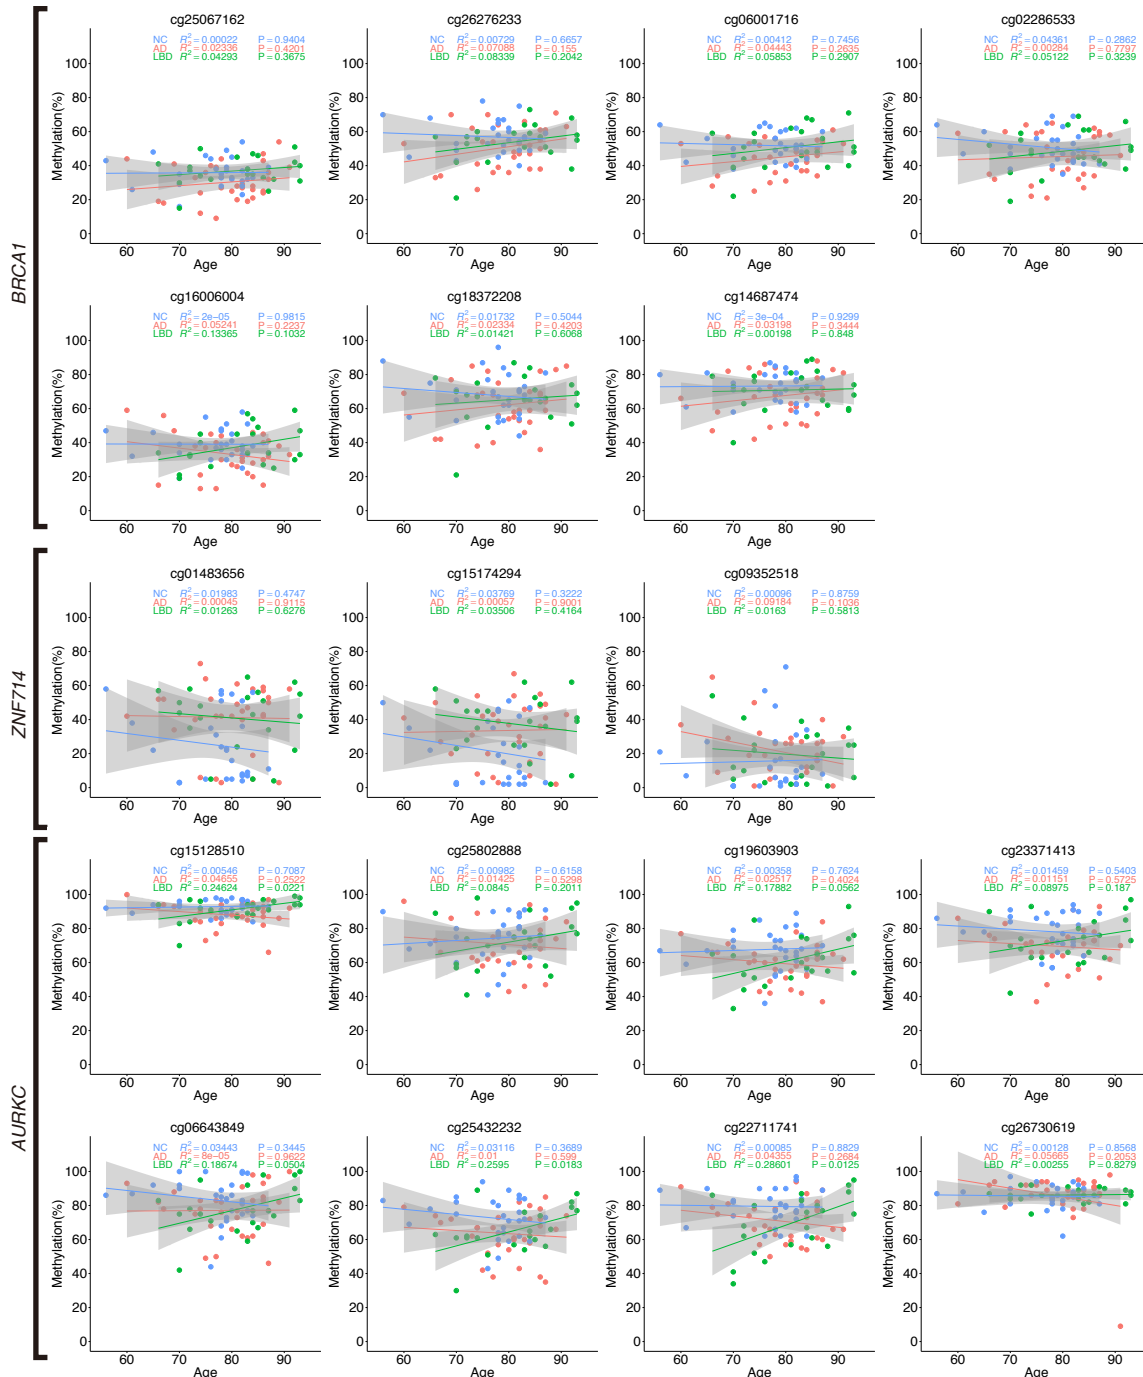

B

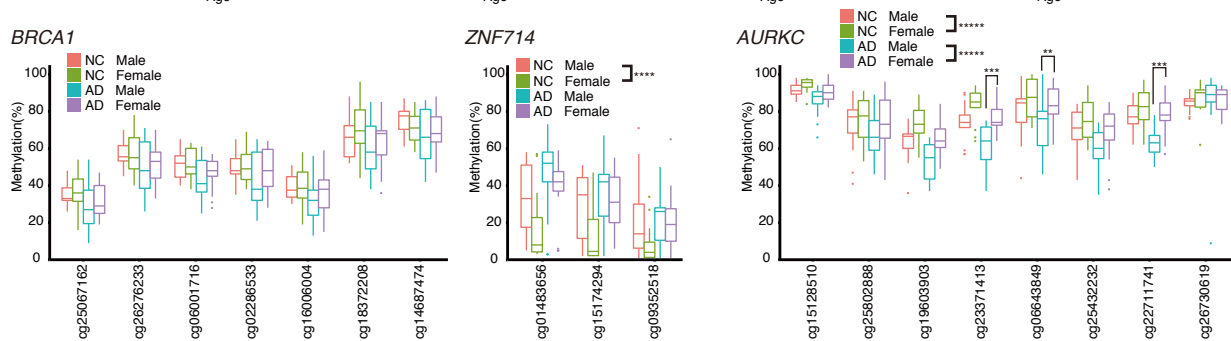

C

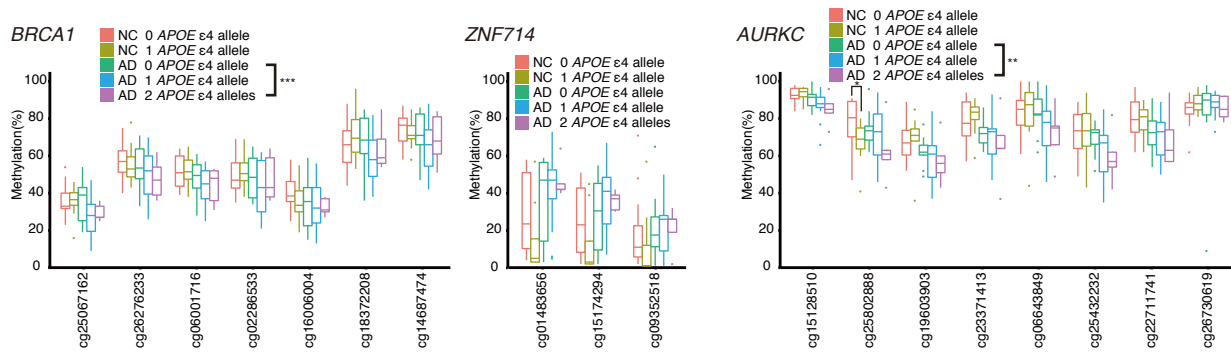

**Figure S4**

Relationship between pyrosequenced methylation level of each DMP and age at death, sex, and the number of *APOE*  $\epsilon 4$  alleles.

(A) Correlation plots of pyrosequenced methylation level of each DMP and age at death for *BRCA1*, *ZNF714*, and *AURKC*. Dots represent individual data and lines are their regression. Blue = NC, red = AD and green = DLB. Gray bands represent a 95% confidence interval of each linear regression. Pearson's product-moment correlation coefficient ( $r$ ) between methylation level and age at death of the subjects and subsequent significance were shown in each graph. ns: not significant, \* $P < 0.05$ .

(B, C) Comparison of each DMP's methylation levels by sex differences (B) and the number of *APOE*  $\epsilon 4$  alleles (C). (B) Orange, green, blue, and purple represent NC male, NC female, AD male, and AD female, respectively. Significance was determined using Two-way ANOVA followed by *post hoc* Sidak method. (C) Orange, light green, green, blue, and purple represent NC without *APOE*  $\epsilon 4$  allele, NC with one *APOE*  $\epsilon 4$  allele, AD without *APOE*  $\epsilon 4$  allele, AD with one *APOE*  $\epsilon 4$  allele, and AD with two *APOE*  $\epsilon 4$  alleles, respectively. Boxes extend from the 25th–75th percentiles and the lines in the boxes are the median. The whiskers were defined by Tukey's boxplot method. Significance was determined for NC and AD using Two-way ANOVA followed

Mano *et al.*  
AD neuronal methylome reveals BRCA1 aggregation  
Supporting Information Appendix

by *post hoc* Tukey (for NC) or Sidak method (for AD).  $R^2$  and P values are shown in the panels.

(A)-(C) The data set analyzed here were identical to that of SI Appendix Fig. S3.

Figure S5

A Advanced stage AD

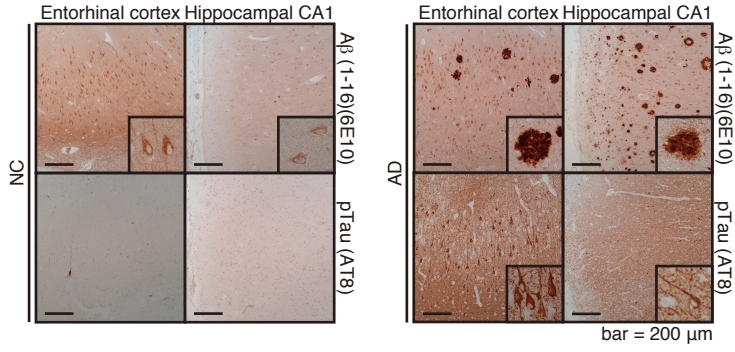

B Advanced stage AD

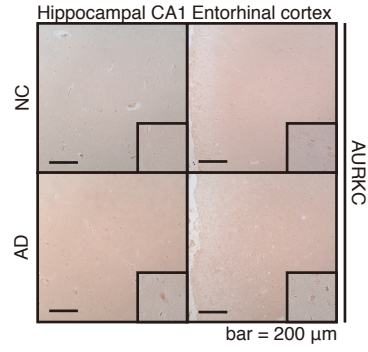

C Early stage AD

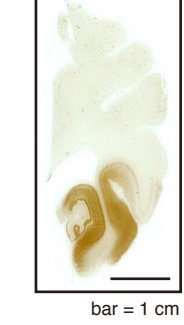

D Early stage AD

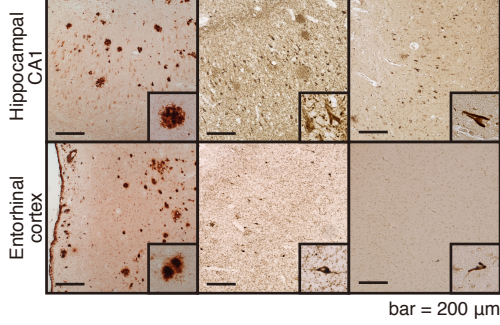

E

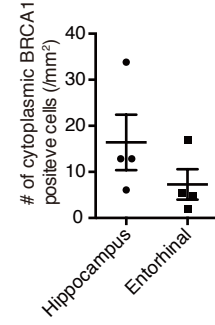

F Early stage AD

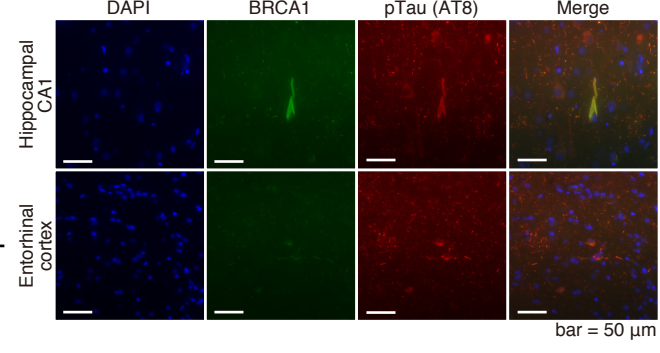

G Advanced stage AD

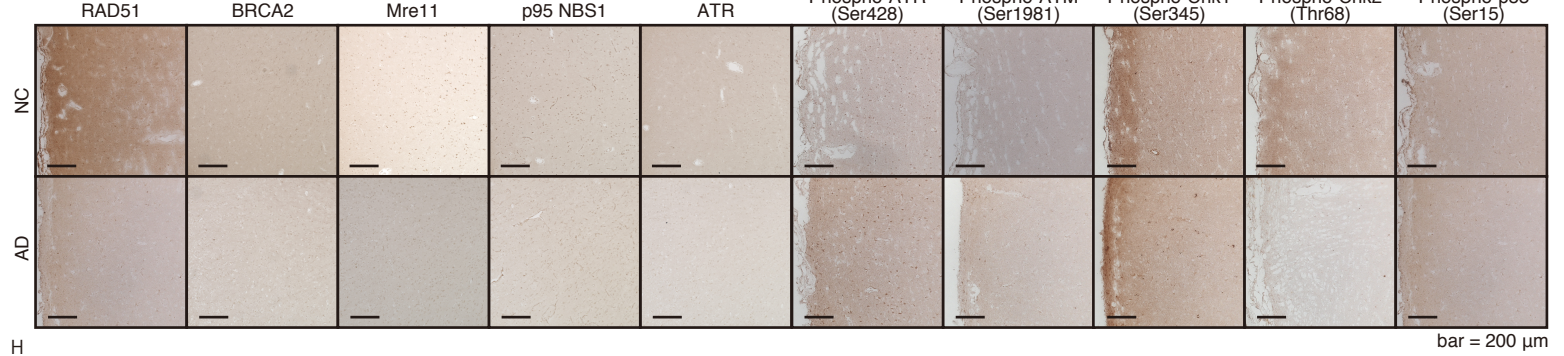

H

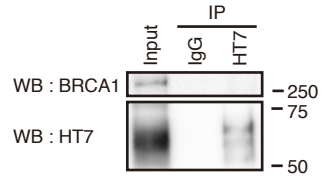

**Figure S5**

Pathological changes in advanced and early stage AD.

(A, B) Immunohistochemical images of the entorhinal cortex and hippocampal CA1 from NC or advanced stage brains AD by anti-A $\beta$  (1-16) anti-pTau (A), and anti-AURKC (B) antibodies.

Representative immunohistochemical images are shown from a total of n = 6. (C) Large scale coronal section at the hippocampal level of the representative early stage AD brain stained by anti-pTau antibody. (D) Immunohistochemical images of subjects harboring early stage AD pathology

by A $\beta$ , pTau and BRCA1 antibodies. n=4. (E) Quantification of panel D. Mean  $\pm$  SEM;  $16.41 \pm$

$6.02 / \text{mm}^2$  in the hippocampus,  $7.27 \pm 3.30 / \text{mm}^2$  in the entorhinal cortex. (F) Immunofluorescence

images of early stage AD brains co-labeled with DAPI, anti-BRCA1, anti-pTau antibodies.

Representative images from n = 4. (G) Immunohistochemical images of inferior temporal gyrus

samples from NC or advanced stage AD brains by antibodies against various DNA repair proteins.

Representative images are shown from a total of n = 3 samples of AD and NC. (H)

Immunoprecipitation of soluble tau from postmortem brain detected by anti-BRCA1.

Figure S6

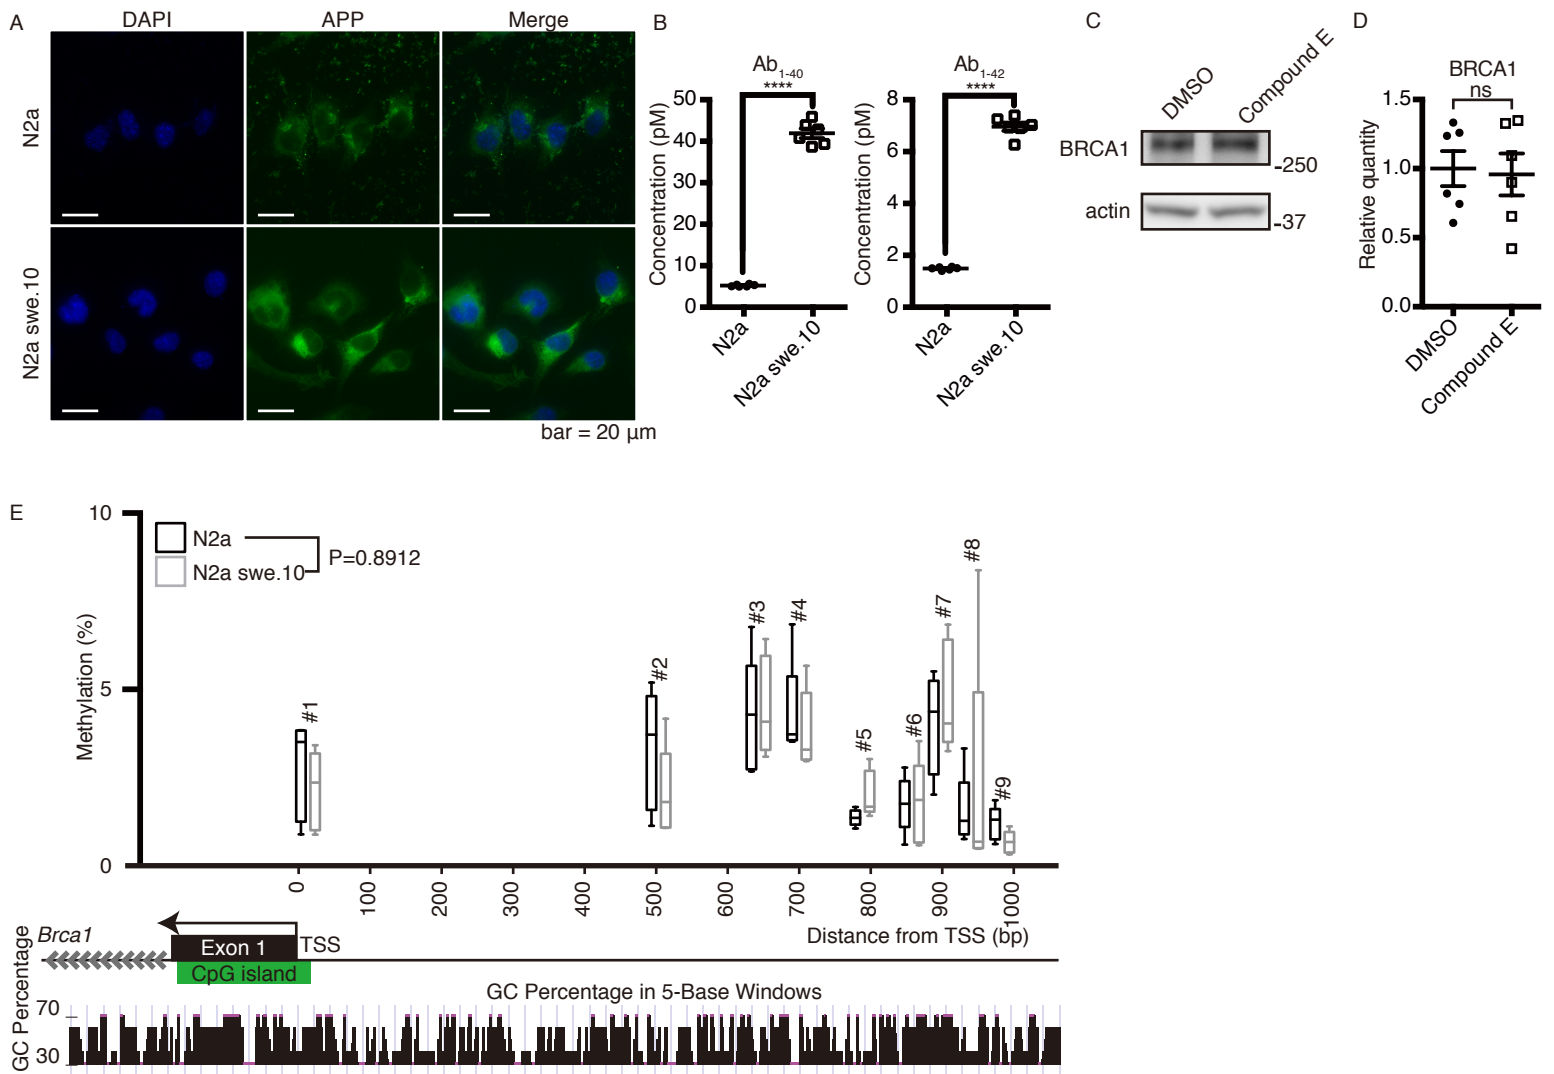

**Figure S6**

APP expression and methylation level analysis of *Brcal* promoter region in N2a and N2a swe.10.

(A) Immunofluorescence images of N2a and N2a swe.10 cells co-labeled with DAPI and anti-APP

antibody. (B) Concentrations of A $\beta$ <sub>40</sub> and A $\beta$ <sub>42</sub> in the culture media supernatant was measured by

ELISA. n = 6 independent wells. Mean  $\pm$  SEM; A $\beta$ <sub>40</sub>: 5.37  $\pm$  0.11 pM in N2a cells vs. 42.09  $\pm$  1.14

pM in N2a swe.10 cells, A $\beta$ <sub>42</sub>: 1.54  $\pm$  0.02 pM in N2a cells vs. 7.02  $\pm$  0.16 pM in N2a swe.10 cells.

(C) Western blot of N2a cells treated with DMSO or Compound E by anti-mouse BRCA1 or anti-

actin antibodies. (D) Quantitative measurement of panel C. n=6. Relative expression level was

normalized to DMSO = 1.0. Mean  $\pm$  SEM; BRCA1: 1.00  $\pm$  0.13 in DMSO and 0.96  $\pm$  0.15 in

Compound E. (E) Pyrosequencing analysis of the *Brcal* promoter region in N2a and swe.10 cells.

Boxes extend from the 25th–75th percentiles and the lines in the boxes represent the median. The

whiskers show the minimum and maximum values. Statistical significance was determined using

two-way ANOVA. The lower panel shows the structure of *Brcal* gene and its CpG island.



Figure S7

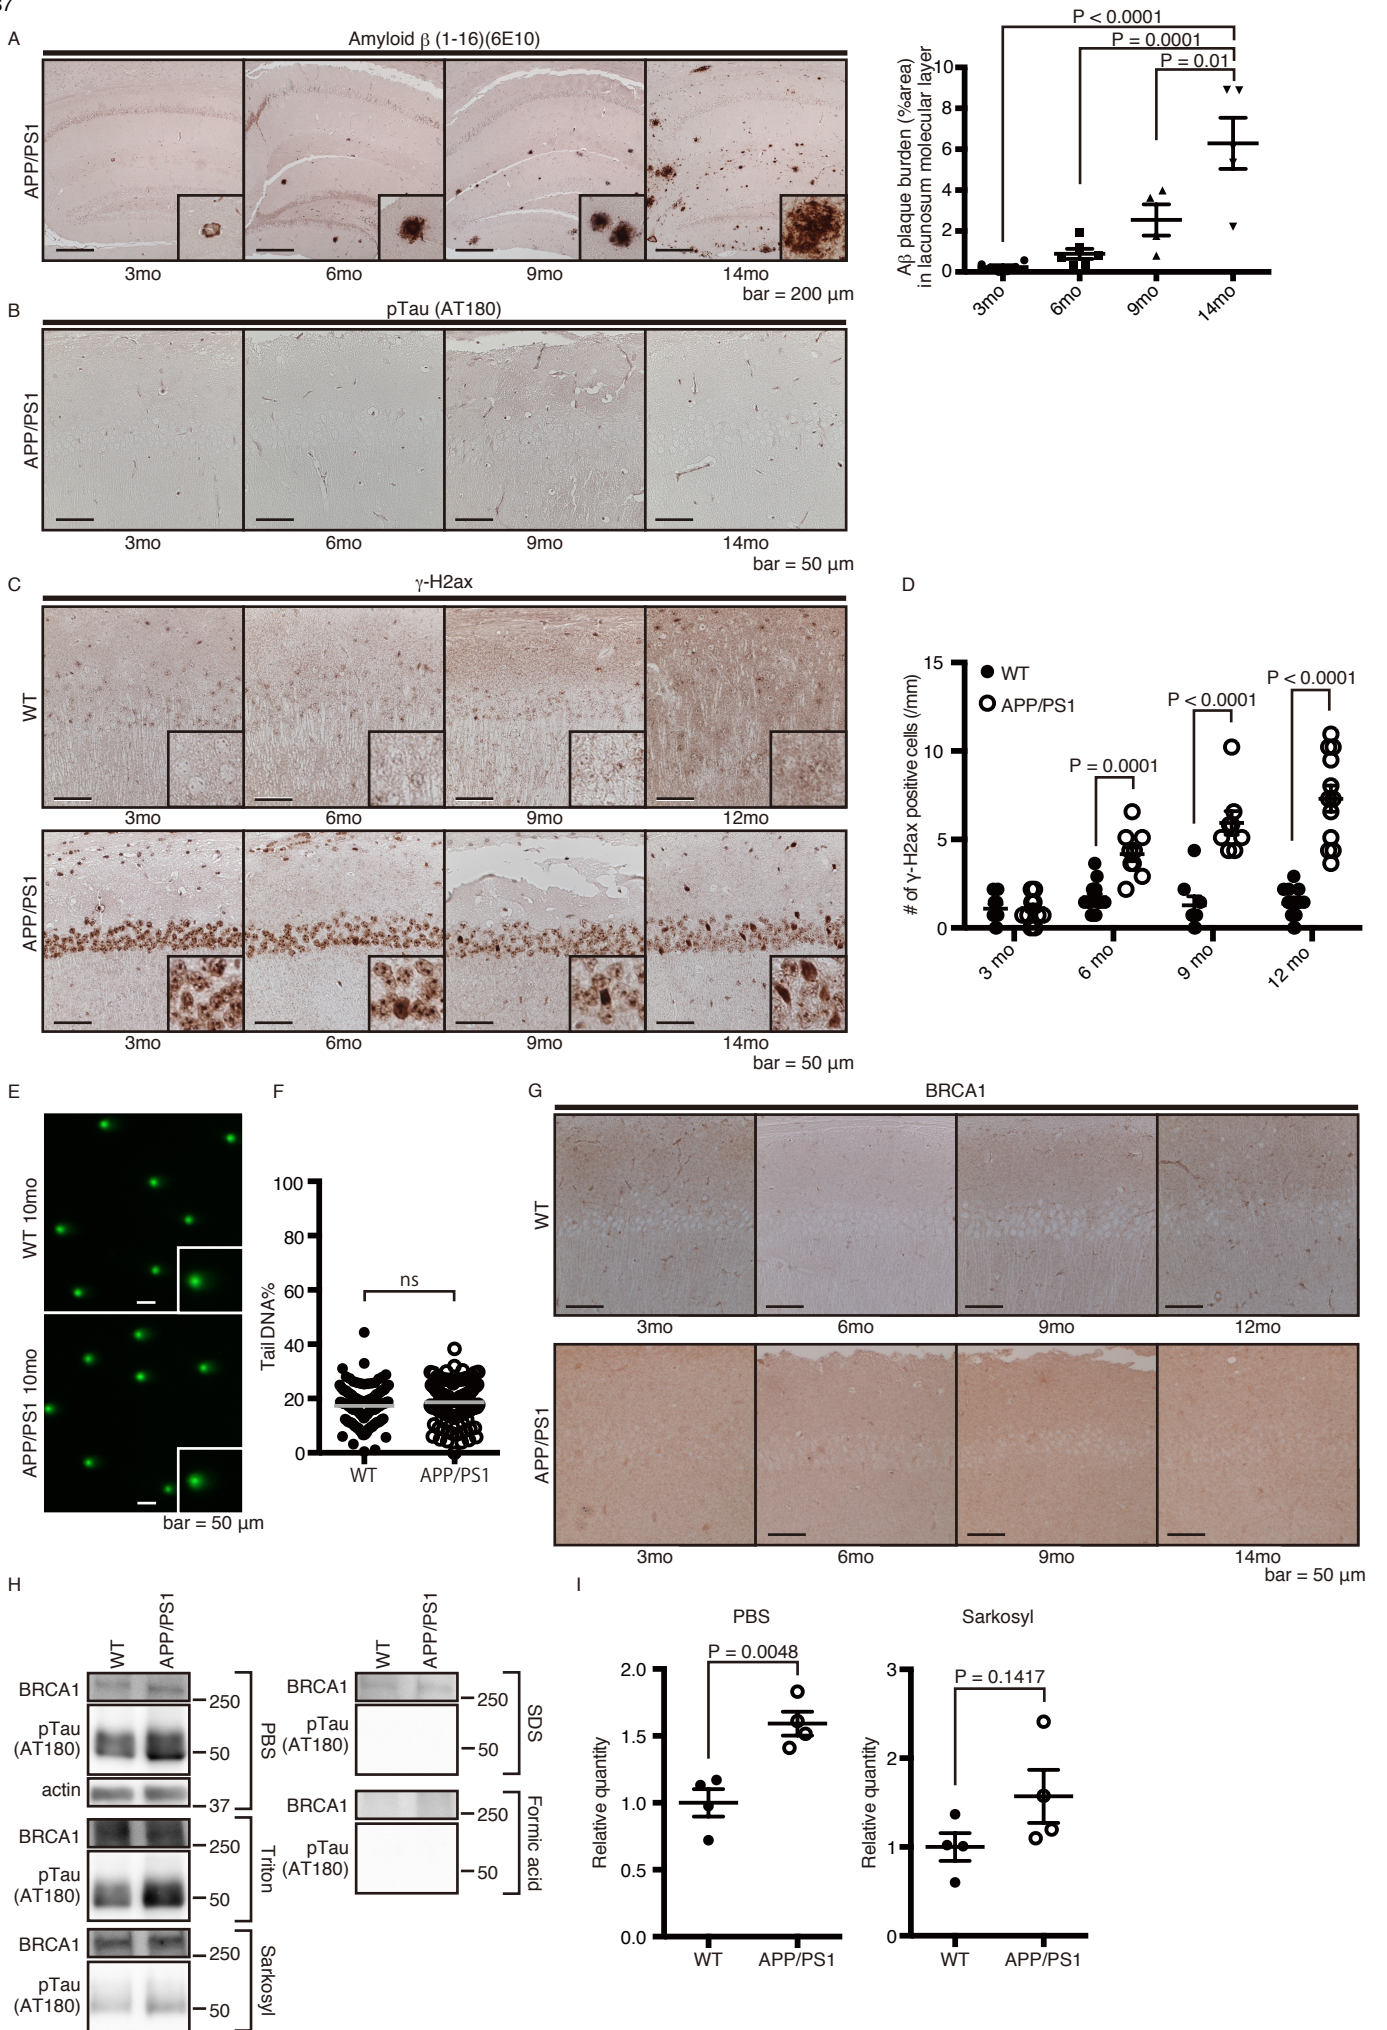



**Figure S7**

Evaluation of BRCA1 expression and DNA DSBs in APP/PS1 mice.

(A, B) Representative immunohistochemical images of A $\beta$  (A) and pTau (B) from APP/PS1

transgenic mice. n = 4 – 6 visual fields from 4 – 6 animals for APP/PS1 mice. Insets are higher

magnifications for A $\beta$  plaques. Quantification of A $\beta$  plaque (%area) is shown at the right side of the

panel. A $\beta$  plaque (%area) mean  $\pm$  SEM; 0.24  $\pm$  0.09 % in 3mo, 0.88  $\pm$  0.25 % in 6mo, 2.54  $\pm$  0.76

% in 9mo and 6.29  $\pm$  1.25 % in 14mo. (C) Representative immunohistochemical images are shown

for  $\gamma$ -H2ax staining. (D) Quantitation of multiple  $\gamma$ -H2ax foci positive cells in panel C experiments.

n = 8 – 16 visual fields from 4 – 7 animals for WT mice. n = 8 – 13 visual fields from 4 – 6 animals

for APP/PS1 mice. Error bars represent mean  $\pm$  SEM. Statistical significance was determined using

the Holm-Sidak method. Mean  $\pm$  SEM; WT: 1.10  $\pm$  0.25 / mm in 3mo, 1.73  $\pm$  0.20 / mm in 6mo,

1.28  $\pm$  0.51 / mm in 9mo and 1.37  $\pm$  0.20 / mm in 12mo, APP/PS1: 1.12  $\pm$  0.20 / mm in 3mo, 4.16  $\pm$

0.39 / mm in 6mo, 5.93  $\pm$  0.67 / mm in 9mo and 7.30  $\pm$  0.74 / mm in 14mo. (E) Comet assay of the

hippocampus from wild type and APP/PS1 mice. Representative microscopic images are shown

from a total of n = 140 cells of the hippocampus from wild type and APP/PS1 mice. Insets are

Mano *et al.*  
AD neuronal methylome reveals BRCA1 aggregation  
Supporting Information Appendix

magnified nuclei. (F) Quantification of tail DNA% measured for each cell, and analyzed semi-automatically by CASPLab software. Solid circles are wild type and open circles are APP/PS1 mice. Statistical significance was determined using *t*-test. Mean  $\pm$  SEM;  $17.25 \pm 0.55$  in WT vs.  $18.64 \pm 0.56$  in APP/PS1. (G) Representative immunohistochemical images are shown for BRCA1 from 4 – 7 animals for WT mice and 4 – 6 animals for APP/PS1 mice. (H) Expression of BRCA1 in the cortical regions from APP/PS1 mice at 12 mo of age. The samples were treated with 1% Triton X-100, 2% Sarkosyl, 0.1% SDS, and 70% formic acid in a serial manner, each time saving the centrifuged supernatant as soluble fractions for each detergent.  $n = 2$  mice at 12 mo of age. Representative blot is shown. (I) Statistical analysis of panel H experiments for PBS and Sarkosyl fractions.  $n = 4$ . Relative quantity against actin expression level was normalized to WT = 1.0. Mean  $\pm$  SEM; PBS:  $1.00 \pm 0.10$  in WT vs.  $1.59 \pm 0.09$  in APP/PS1, Sarkosyl:  $1.00 \pm 0.16$  WT vs.  $1.57 \pm 0.30$  in APP/PS1.

Figure S8

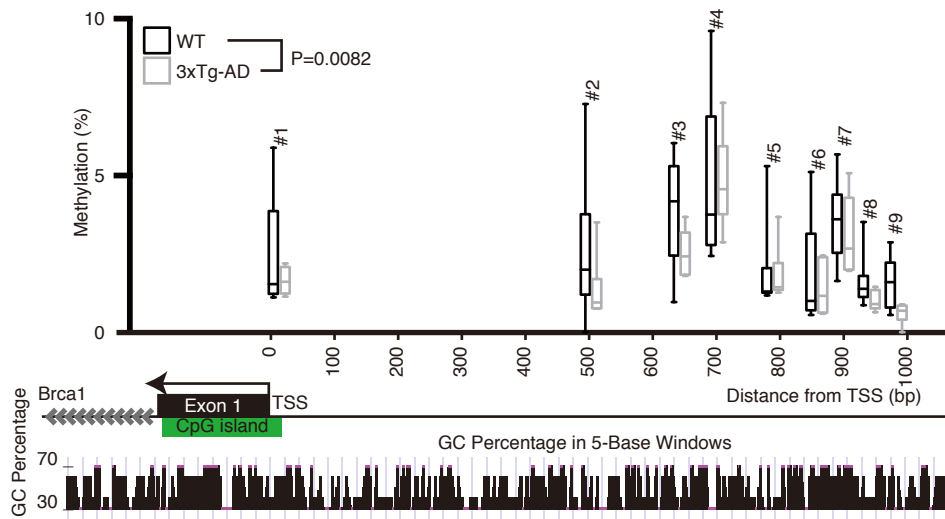

**Figure S8**

Methylation level of the *Brcal* promoter region in 3×Tg-AD and wild type mice.

Boxes extend from the 25th–75th percentiles and the lines in the boxes represent the median. The

whiskers show the minimum and maximum values. Statistical significance was determined using

two-way ANOVA,  $P = 0.0082$ . WT mice ( $n = 9$ ),  $7.71 \pm 1.10$  months old; 3×Tg-AD ( $n = 6$ ),  $8.46, \pm$

1.43 months old.

Figure S9

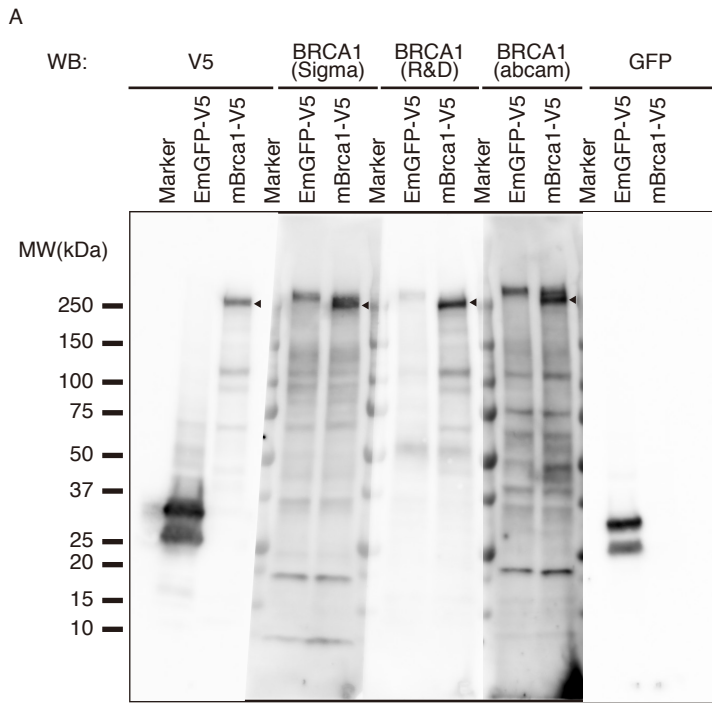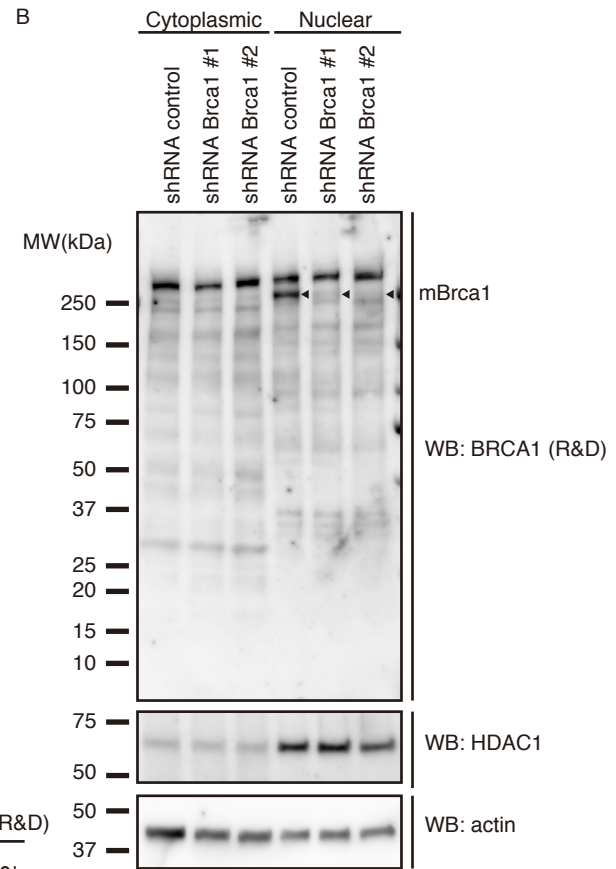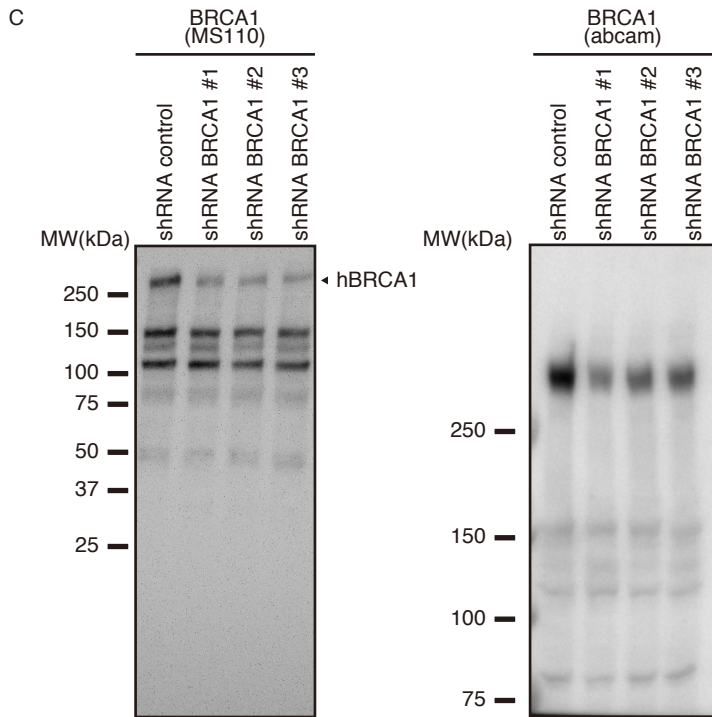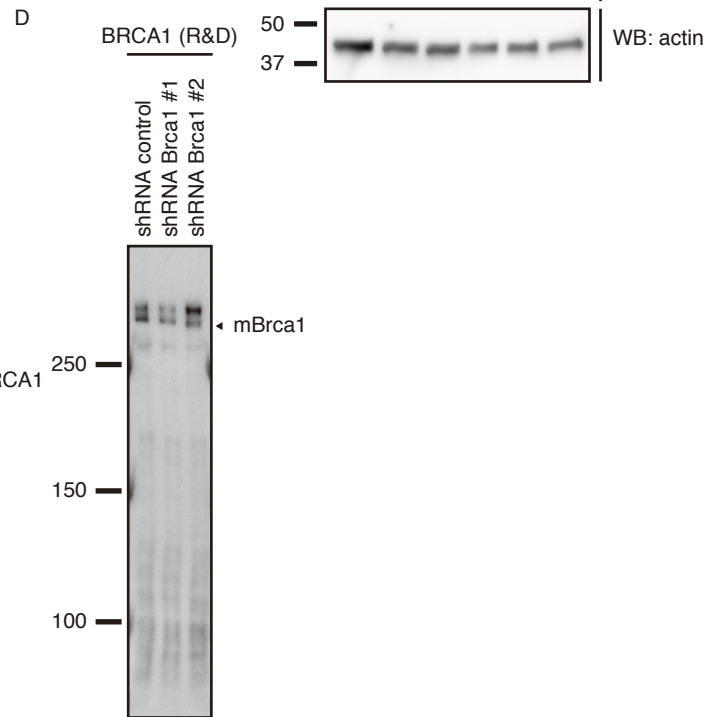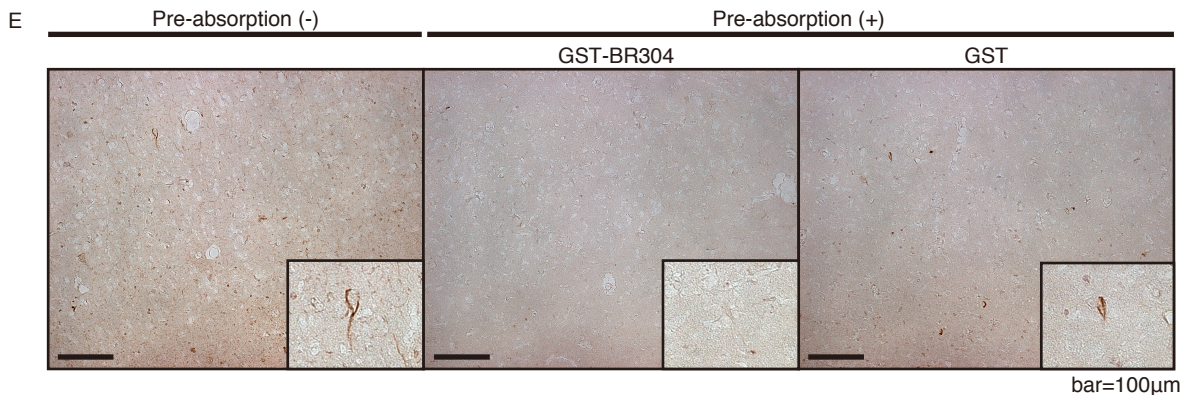

**Figure S9**

Validation of anti-BRCA1 antibodies in its detectability of human and murine BRCA1.

(A) Western blot of 293FT cells transiently transfected V5-tagged murine Brca1 or EmGFP detected by using various anti-BRCA1 antibodies. (B) N2a cells were infected with lentivirus containing various shRNAs. After harvest, cells were fractionated to cytoplasmic and nuclear fraction using hypotonic buffer and detergents. (C) HeLa cells were infected with lentivirus containing various shRNAs. Total cellular lysate was subjected to western blot. The arrowheads indicate human BRCA1. (D) Knock-down of murine Brca1 in primary cortical culture from 3×Tg-AD mice. (E) Antigen pre-absorption assay with GST-tagged N-terminal segment of BRCA1 (residues 1-304) (GST-BR304). Anti-human BRCA1 antibody (MS110) was pre-absorbed with GST-BR304, and subjected to immunostaining. Serial sections were stained with the same antibody without absorption or with absorption with GST. Insets are magnified view of the neuronal cells.

Figure S10

A Biological replicates for Fig. 4C, D

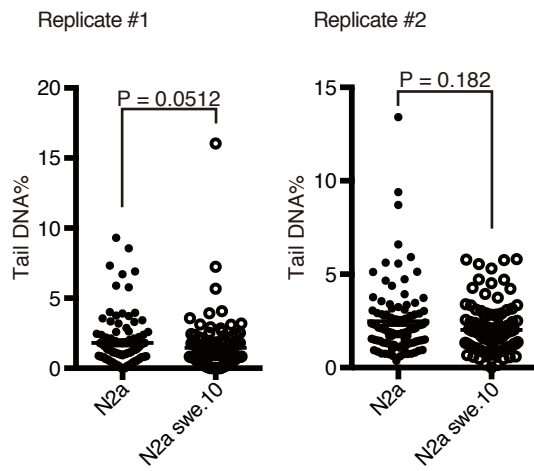

B Biological replicates for Fig. 4E, F

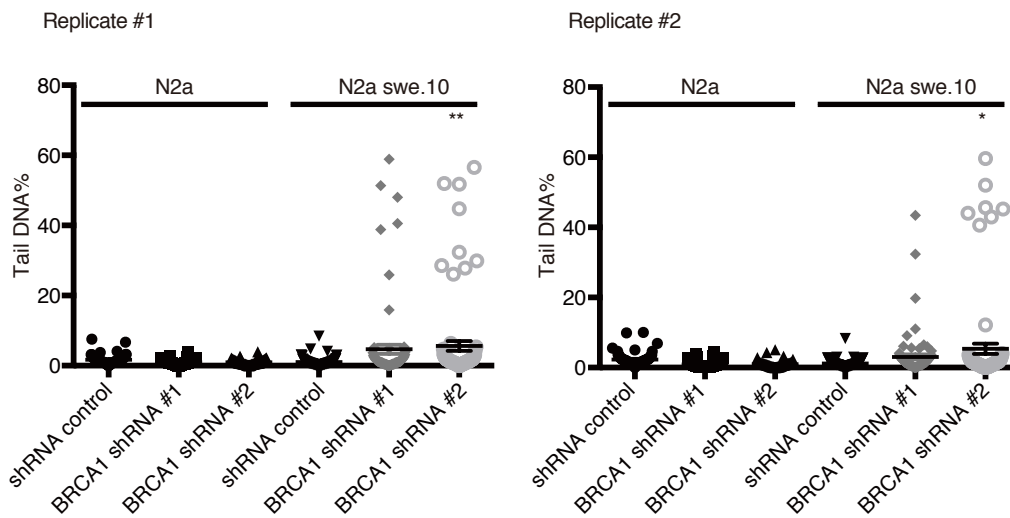

**Figure S10**

Biological replicates for comet assays in Figure 4

Comet assays were performed independently in 2 biological replicates for Figure 4C, D (A) and

Figure 4E, F (B).  $n = 100$  cells (A) or 80 cells (B) for each cell line. Statistical significance was

determined by unpaired Student *t*-test (A) or the Turkey's method (B). Mean  $\pm$  SEM were as

follows.

(A) Replicate #1:  $1.81 \pm 0.18$  % in N2a cells vs.  $1.46 \pm 0.19$  % in N2a swe.10 cells

Replicate #2:  $2.48 \pm 0.19$  % in N2a cells vs.  $2.02 \pm 0.13$  % in N2a swe.10 cells

(B) Replicate #1: N2a:  $1.70 \pm 0.14$  % in shRNA control,  $0.98 \pm 0.08$  % in shRNA #1,  $0.99 \pm 0.08$  %

in shRNA #2, N2a swe.10:  $1.03 \pm 0.14$  % in shRNA control,  $4.67 \pm 1.32$  % in shRNA #1,  $5.65 \pm$

$1.41$  % in shRNA #2

Replicate #2: N2a:  $2.27 \pm 0.19$  % in shRNA control,  $0.91 \pm 0.10$  % in shRNA #1,  $0.95 \pm 0.10$  % in

shRNA #2, N2a swe.10:  $1.17 \pm 0.13$  % in shRNA control,  $3.05 \pm 0.71$  % in shRNA #1,  $5.39 \pm 1.48$

% in shRNA #2
